RESEARCH ARTICLE

# A comparison of RSV and influenza in vitro kinetic parameters reveals differences in infecting time

Gilberto González-Parra<sup>1,2</sup>, Filip De Ridder<sup>3</sup>, Dymphy Huntjens<sup>3</sup>, Dirk Roymans<sup>3</sup>, Gabriela Ispas<sup>3</sup>, Hana M. Dobrovolny<sup>1\*</sup>

**1** Department of Physics and Astronomy, Texas Christian University, Fort Worth, TX, United States of America, **2** Department of Mathematics, New Mexico Tech, Socorro, NM, United States of America, **3** Janssen R&D Belgium, Beerse, Belgium

\* [h.dobrovolny@tcu.edu](mailto:h.dobrovolny@tcu.edu)

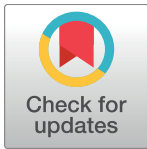

**OPEN ACCESS**

**Citation:** González-Parra G, De Ridder F, Huntjens D, Roymans D, Ispas G, Dobrovolny HM (2018) A comparison of RSV and influenza in vitro kinetic parameters reveals differences in infecting time. PLoS ONE 13(2): e0192645. <https://doi.org/10.1371/journal.pone.0192645>

**Editor:** Jie Sun, Mayo Clinic Minnesota, UNITED STATES

**Received:** May 31, 2017

**Accepted:** January 26, 2018

**Published:** February 8, 2018

**Copyright:** © 2018 González-Parra et al. This is an open access article distributed under the terms of the [Creative Commons Attribution License](https://creativecommons.org/licenses/by/4.0/), which permits unrestricted use, distribution, and reproduction in any medium, provided the original author and source are credited.

**Data Availability Statement:** All relevant data are within the paper.

**Funding:** Funding for this work was provided by Janssen R&D Belgium. FDR, DH, DR, and GI are employees of Janssen R&D Belgium. The funder provided support in the form of salaries for authors GG, HMD. The funder did not have any additional role in the study design, data collection and analysis, decision to publish, or preparation of the manuscript. The specific roles of these authors are articulated in the author contributions section.

## Abstract

Influenza and respiratory syncytial virus (RSV) cause acute infections of the respiratory tract. Since the viruses both cause illnesses with similar symptoms, researchers often try to apply knowledge gleaned from study of one virus to the other virus. This can be an effective and efficient strategy for understanding viral dynamics or developing treatment strategies, but only if we have a full understanding of the similarities and differences between the two viruses. This study used mathematical modeling to quantitatively compare the viral kinetics of in vitro RSV and influenza virus infections. Specifically, we determined the viral kinetics parameters for RSV A2 and three strains of influenza virus, A/WSN/33 (H1N1), A/Puerto Rico/8/1934 (H1N1), and pandemic H1N1 influenza virus. We found that RSV viral titer increases at a slower rate and reaches its peak value later than influenza virus. Our analysis indicated that the slower increase of RSV viral titer is caused by slower spreading of the virus from one cell to another. These results provide estimates of dynamical differences between influenza virus and RSV and help provide insight into the virus-host interactions that cause observed differences in the time courses of the two illnesses in patients.

## Introduction

Acute respiratory tract infections with respiratory syncytial virus (RSV) and influenza are leading causes of respiratory illness [1]. Both infections produce similar symptoms and lead to serious illness primarily in the young and the elderly [2, 3]. Given these similarities, it can be useful to compare the viral dynamics of the two viruses in cells because this may help to understand the different viral dynamics in patients, and consequently to translate the knowledge of treating one illness to help treating the other.

Comparison of the two illnesses began shortly after the discovery of RSV [4]. Until recently, comparative studies focused on the mortality of the two diseases [5], to understand disease burden, and on differentiating the symptoms of the two diseases [4, 6–8], in order to assist

**Competing interests:** FDR, DH, DR, and GI are employees of Janssen R&D Belgium. HMD received funding from Janssen R&D Belgium, and GG's salary was paid by a grant from Janssen R&D Belgium. This does not alter our adherence to PLOS ONE policies on sharing data and materials.

with diagnosis. More recent comparative studies have turned to investigations of differences in immune response [8–11] in an effort to more fundamentally understand dynamical differences between the two diseases. Of particular interest is a recent study by Bagga *et al.* [12] in which healthy volunteers were inoculated with either influenza virus or RSV and daily viral loads were measured. A comparison of the viral titer curves noted that RSV showed a longer incubation period than influenza virus. Influenza virus also appeared to propagate very quickly, rising from first detection to peak viral titer within 24 h, while RSV grew more slowly, taking between 24–48 h to reach the peak viral titer. Both of these features lead to a later time of peak viral titer for RSV than for influenza virus. Since this was a clinical study, with no observation of the infection at the cellular level, the underlying mechanism for slower RSV growth was not determined. The authors themselves suggested that a better understanding of the cellular-level mechanisms causing differences between RSV and influenza virus could help in the development of antivirals for RSV.

There currently are antivirals for treatment of influenza virus and promising new antivirals in the pipeline [13, 14]. However, there has historically been less success in development of antivirals for RSV [15, 16]. A few possible RSV antivirals are being investigated [17–19], but a better understanding of the similarities and differences between RSV and influenza virus might allow development of more effective antivirals against both infections.

Mathematical models of viral infections can help us develop a better understanding of differences in viral propagation dynamics through a quantitative comparative analysis of viral kinetics parameters. This type of analysis has previously been done to compare different strains of influenza virus [20–22]. Influenza viral kinetics models have also helped further our understanding of the causes of disease severity [23], the emergence of drug resistance [24, 25], and intracellular viral replication [26]. While more complex, some attempts have been made to extend these models to reflect *in vivo* infections through the inclusion of an immune response [27–29] or consideration of associated symptoms [25, 30]. In addition, mathematical models can be used to describe the pharmacodynamic effects of new compounds in a strict quantitative manner [31, 32]. Thus, the combination of viral kinetics and pharmacodynamic models can help us assess the influence of different mechanisms of actions [26, 33], or the effect of combination therapies [34].

In this paper, we describe a quantitative comparative analysis of RSV and influenza viral kinetics. We use data collected from literature of *in vitro* RSV and influenza virus infections to extract viral kinetics parameters through fitting with both an empirical and a viral kinetics model. We then use statistical analysis to determine whether there are significant differences in viral kinetics between RSV and influenza virus. Our results support the findings of Bagga *et al.* [12] since we find that RSV has a slower growth rate and later time of viral peak than influenza virus *in vitro*. Our analysis, however, also suggests a possible mechanism for these observations since we find that the key difference in the dynamics of RSV and influenza virus is that RSV takes longer to transmit virus from infectious cells to healthy cells.

## Materials and methods

### Models

We use two models to characterize both RSV and influenza virus *in vitro* infections. The first model is an empirical description of the viral time course, first presented by Holder and Beauchemin in 2011 [35]. While this model does not give insight into the underlying dynamics of the infection, it allows for a quantitative comparison of viral titer characteristics between

influenza virus and RSV. The model is given by the equation

$$V(t) = \frac{2V_p}{\exp[-\lambda_g(t - t_p)] + \exp[\lambda_d(t - t_p)]}, \tag{1}$$

where  $\lambda_g$  and  $\lambda_d$  are the exponential growth and decay rates, respectively,  $V_p$  is the peak viral titer, and  $t_p$  is the time of viral titer peak. Note that the growth and decay rates here refer to growth and decay in the number of viral particles. This simple functional form has only four independent parameters, making parameter identifiability simpler than for a kinetic model of viral infection. For this model, four data points are required, with at least two data points required during the growth phase and at least two required during the decay phase to identify the parameters.

The second model we will use is a viral kinetics model. The model is an extension of the basic viral infection model for influenza virus described in [36],

$$\begin{aligned} \frac{dT}{dt} &= -\frac{\beta}{N}TV \\ \frac{dE_1}{dt} &= \frac{\beta}{N}TV - \frac{n_E}{\tau_E}E_1 \\ \frac{dE_j}{dt} &= \frac{n_E}{\tau_E}E_{j-1} - \frac{n_E}{\tau_E}E_j \quad \text{for } j = (2, \dots, n_E) \\ \frac{dI_1}{dt} &= \frac{n_E}{\tau_E}E_{n_E} - \frac{n_I}{\tau_I}I_1 \\ \frac{dI_j}{dt} &= \frac{n_I}{\tau_I}I_{j-1} - \frac{n_I}{\tau_I}I_j \quad \text{for } j = (2, \dots, n_I) \\ \frac{dV}{dt} &= p \sum_{j=1}^{n_I} I_j - cV. \end{aligned} \tag{2}$$

In the model, pictured in Fig 1, target cells,  $T$ , become infected at rate  $\beta$  when they encounter virus,  $V$ . Upon infection, the cells enter an eclipse state,  $E$ , where they are infected, but not yet producing virus. After an average time  $\tau_E$ , the cells transition to a productively infectious state,  $I$ , where they are producing virus at rate  $p$ . After an average time  $\tau_I$ , the infected cells die. Virus loses infectivity at a rate  $c$ . Since our model does not explicitly include an adaptive immune response, the value of  $c$  will also reflect the contribution of the in vitro innate response in

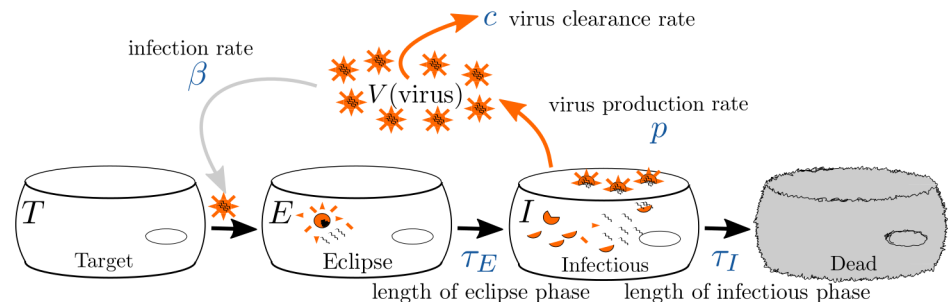

**Fig 1. Viral kinetics model.** The virus,  $V$ , attacks target cells,  $T$ , at rate  $\beta$ . Once infected, target cells enter the eclipse phase,  $E$ . The eclipse phase lasts an average time of  $\tau_E$ , after which the cells become infectious cells,  $I$ . The infectious cells produce new virions at rate  $p$ , and the virus decays at rate  $c$ . The cells remain infectious for an average time of  $\tau_I$ , after which they die.

<https://doi.org/10.1371/journal.pone.0192645.g001>

clearing the virus. Studies indicate, however, that in vitro loss of viral infectivity for influenza virus is primarily due to degradation of the virus rather than the effect of an immune response [20, 37]. This model assumes a gamma distribution, represented by the multiple compartments for  $E$  and  $I$ , for the transition times between the eclipse state and the infectious state, as well as for the transition times between the infectious and dead cells. The number of compartments in the eclipse state is given by  $n_E$  while the number of compartments in the infectious state is given by  $n_I$ . Gamma-distributed models of viral kinetics have previously been used to study influenza virus infections [20, 21], as well as SHIV infections [38]. This model has more parameters than the empirical model, some of which cannot be identified with viral titer data alone [20, 39].

### Data selection criteria

The literature was searched for data of in vitro RSV and influenza virus infections. Only data from studies with a reported multiplicity of infection (MOI) of less than one, were used. We further required that the studies measure released virus or virus in the supernatant rather than cell-associated virus. A third requirement was that the experimental data contained at least two data points during the growth phase of the infection and two data points during the decay phase of the infection, so that parameters from both phases of the infection could be estimated. For RSV data, all data sets use the A2 strain of RSV, but since there is wide variation in the cell lines used for infections, only studies that used cells of human origin were included. For influenza virus, data was limited to the following common experimental strains: A/WSN/33 (H1N1), which was denoted WSN33; the H1N1 pandemic strain, which was denoted pH1N1; and A/Puerto Rico/8/1934 (H1N1), which was denoted PR8. For influenza virus, experiments performed in Madin-Darby canine kidney (MDCK) cells were selected, since this is the most common experimental substrate for influenza virus experiments. In addition, a number of in vitro experiments of WSN33 infections in Madin-Darby bovine kidney (MDBK) cells were included in our study, which were used to examine the effect of cell type on viral kinetics parameters.

### Fitting algorithms

The model was fitted to in vitro viral RSV and influenza virus experimental data in order to obtain the parameter value estimates for each virus. We determined the best fit by minimizing the sum of squared residuals (SSR),

$$SSR = \sum_{i=1}^n (y_i - f(t_i))^2, \tag{3}$$

where  $n$  is the number of experimental data points,  $y_i$  are the values of the experimental data points, and  $f(t_i)$  are the model predictions at the times when experimental data were measured. A small SSR indicates a tight fit of the model to the experimental data. In order to better compare fits of the models between different data sets, we also calculated the root mean squared error,

$$\sqrt{MSE} = \sqrt{\frac{SSR}{n - N}}, \tag{4}$$

where  $n$  is again the number of data points and  $N$  is the number of free parameters in the model.  $\sqrt{MSE}$  corrects for differences in number of data points between different data sets, providing a more standardized measure of goodness of fit. Note that  $\sqrt{MSE}$  does not exist if the number of data points is less than the number of parameters  $n < N$ .

We used the `fmincon` algorithm in Matlab to find the minimum SSR for both the empirical and viral kinetics models. For the empirical model, no constraints were used in the fitting process. For the viral kinetics model, we fixed the initial number of target cells to  $T_0 = 1$  and assumed that the infection was started with an unknown (to be fitted) initial viral inoculum, assuming that there are initially no cells in any of the eclipse or infectious compartments. We know that some parameters are not identifiable for this model [20, 39], so we fixed the number of compartments in both the eclipse and infectious phases,  $n_I = n_E = 60$ , and set bounds on the searched parameter space as follows:  $10^{-10}$ – $10^0$  /h for  $p$ ;  $10^{-10}$ – $10$  /h for  $\beta$ ;  $10^{-4}$ – $10$  /h for  $c$ ; 2–72 h for  $\tau_I$ ; 1–48 h for  $\tau_E$ ;  $10^{-7}$ – $10^{16}$  for  $V_0$ . Note that the bounds are quite large and are meant to eliminate the possibility of finding biologically unrealistic parameter values.

### Viral kinetics parameters

It is difficult to compare parameter estimates from different experiments since the units of viral titer depend on the assay used to determine the viral titer, as well as viral extraction and amplification methods [21]. There is no universal standard viral titer unit, making comparison of parameters such as  $p$  and  $\beta$  irrelevant. Therefore, we focused on parameters which have a universal standardized unit. In addition to the mean duration of the eclipse phase  $\tau_E$  and the mean duration of the infectious phase  $\tau_I$ , the infecting time,  $t_{inf} = \sqrt{2/p\beta}$ , [35], which is the average time between release of a virion from an infectious cell and infection of another cell, was calculated. The infecting time can be derived directly from the viral kinetics model equations as follows. We assume that we have a single infected cell and that viral degradation is negligible during this short time frame, so the viral equation becomes

$$\frac{dV}{dt} = p.$$

This is easily integrated to give

$$V(t) = pt.$$

Since we are interested in counting cells entering the eclipse phase, and not those leaving, the equation for eclipse cells becomes

$$\frac{dE}{dt} = \frac{\beta}{N} VT.$$

Substituting our result for  $V$  into this equation and assuming that  $T \approx N$ , the differential equation for  $E$  becomes

$$\frac{dE}{dt} = \beta pt.$$

The infecting time is the time at which a single new cell is infected, so we integrate  $E$  from 0 to 1 and  $t$  from 0 to  $t_{inf}$

$$1 = \beta p \frac{t_{inf}^2}{2},$$

or solving for infecting time,

$$t_{inf} = \sqrt{\frac{2}{p\beta}}.$$

## Statistical analysis

In order to identify statistically significant differences in parameters between relevant groups, we performed a Mann-Whitney (Wilcoxon rank-sum) test. We use the Mann-Whitney test since we cannot assume normal distributions for the parameters as is required for other statistical tests. When distributions are continuous, as they are in our case, the Mann-Whitney test can be interpreted as determining whether there is a significant difference in the medians of the two distributions. In our analysis, the Mann-Whitney test was used to determine whether the median of a given parameter obtained by fitting one set of data (RSV, for example) was equal to that obtained by fitting another set of data (one of the flu data sets).

## Results

### Comparison of RSV and influenza virus

We searched the literature and collected 36 data sets of experimental infections that satisfied the requirements outlined in the Methods section. A summary of the data sets used in this study is given in [Table 1](#). The data sets are shown, in groups, in [Fig 2](#). The RSV data sets were fairly consistent, showing similar growth rates and time of peak viral titer ([Fig 2a](#)). The pH1N1 data sets also showed similar growth rates, but seemed to vary in their time and extent of peak viral titer ([Fig 2b](#)). Moreover, most data sets showed a plateau of the viral titer probably because all cells in the cultures were infected at the moment peak viral titer was reached. The PR8 data sets seem to have the fastest growth, with the exception of one of the Schulze-Horsel data sets ([Fig 2c](#)). The WSN in MDCK data sets also show similar growth rates, although the peak viral titer varies. ([Fig 2d](#)). The variation in peak viral titer is somewhat less when WSN infects MDBK cells, although there seems to be more variation in the growth rate of WSN in MDBK cells ([Fig 2e](#)).

Since the empirical model helps to quantitatively describe the temporal course of viral titer, we first fitted all the selected RSV and influenza virus data sets to this model ([Fig 3](#)). The analysis demonstrated that the median growth rate for RSV is 0.18 IU/h, while for different influenza virus strains this is significantly faster, ranging from 0.51 to 0.62 IU/h ([Table 2](#), [Fig 4](#)), meaning that influenza viral titer grows about three times more rapidly than RSV viral titer. The median decay rate for RSV was calculated to be 0.023 IU/h and was found to be similar for the different influenza virus strains (0.029 IU/h – 0.057 IU/h) ([Table 2](#), [Fig 4](#)). Our data analysis demonstrates that infections with different influenza virus strains reach time of peak viral titer about one day earlier than RSV.

Next, data from the same set of studies were analysed by the viral kinetics model to obtain some insight into the processes governing the viral life cycle ([Table 3](#) & [Fig 3](#)). With this analysis, we estimated  $t_{inf}$ , the time between release of a virus from one cell and infection of the next cell;  $c$ , the degradation rate;  $\tau_b$ , the duration of the infectious phase; and  $\tau_E$ , the duration of the eclipse phase. We determined that the median  $t_{inf}$  for RSV of 3.00 h is considerably longer than for influenza virus ([Tables 3](#) & [4](#), [Fig 5](#)). Degradation rates appear to be similar for RSV and different influenza virus strains with median values ranging from 0.030 IU/h to 0.045 IU/h. These values are similar to the values found for the decay rate using the empirical model. The median duration of the infectious phase for RSV is 11.8 h, which is longer than the 3 to 4 h median values found for the influenza virus data sets. Finally, the median duration of the eclipse phase for RSV (6.38 h) is also longer than the median duration found for the influenza virus data sets (between 1.1 and 2.7 h). Combined, these data can be used to model the time course of RSV and different influenza virus strains ([Fig 6a](#)), and they explain why RSV reaches peak viral titer later than influenza virus ([Fig 6b](#)).

**Table 1. Data sets used in this study.**

| Paper                      | Figure*        | Cell type | Number of data points | MOI                |
|----------------------------|----------------|-----------|-----------------------|--------------------|
| <b>RSV</b>                 |                |           |                       |                    |
| Birmingham (1999) [40]     | 4B             | HEp-2     | 9                     | 0.01               |
| Brock (2003) [41]          | 1B             | HEp-2     | 6                     | 0.25               |
| Liesman (2014) [42]        | 1C             | HAE       | 9                     | 1                  |
| Marquez (1967) [43]        | 2              | HEp-2     | 8                     | 0.01               |
| Shahrabadi (1988) [44]     | 2A             | HEp-2     | 6                     | 0.1                |
| Straub (2011) [45]         | 2A             | A549      | 6                     | 0.1                |
| Villenave (2011) [46]      | 4A (A2 strain) | PBEC      | 5                     | 0.1                |
| Villenave (2012) [47]      | 1A (A2 strain) | WD-PBEC   | 7                     | 0.1                |
| <b>pH1N1</b>               |                |           |                       |                    |
| Duan (2010) [48]           | 1C             | MDCK      | 6                     | 0.001              |
| Kaminski (2013) [49]       | 2A             | MDCK      | 5                     | 0.001              |
| Le Goff (2012) [50]        | 4              | MDCK      | 6                     | 0.001              |
| Pinilla (2012) [20]        | 2A             | MDCK      | 12                    | $5 \times 10^{-5}$ |
| Paradis (2015) [21]        | 1A             | MDCK      | 12                    | $5 \times 10^{-5}$ |
| <b>PR8</b>                 |                |           |                       |                    |
| Cubitt (1997) [51]         | 3B             | MDCK      | 4                     | 0.5                |
| De Baets (2013) [52]       | 1E             | MDCK      | 7                     | 0.001              |
| Li (2010) [53]             | 2B             | MDCK      | 6                     | 0.001              |
| Schulze-Horsel (2009) [54] | 3A             | MDCK      | 13                    | 0.025              |
| Schulze-Horsel (2009) [54] | 3B             | MDCK      | 14                    | 0.025              |
| Yamada (2012) [55]         | 2              | MDCK      | 5                     | 0.001              |
| Yen (2007) [56]            | 1D             | MDCK      | 5                     | $1 \times 10^{-4}$ |
| <b>WSN33 MDCK</b>          |                |           |                       |                    |
| Baz (2010) [57]            | 1B             | MDCK      | 5                     | 0.001              |
| Cheung (2005) [58]         | 3B             | MDCK      | 5                     | 0.01               |
| Chiang (2008) [59]         | 7A             | MDCK      | 6                     | 0.001              |
| Das (2012) [60]            | 1D             | MDCK      | 6                     | 0.001              |
| Grantham (2009) [61]       | 1B             | MDCK      | 5                     | 0.001              |
| Muramoto (2013) [62]       | 3              | MDCK      | 7                     | $5 \times 10^{-4}$ |
| Ran (2013) [63]            | 2              | MDCK      | 6                     | 0.001              |
| Tauber (2012) [64]         | 3              | MDCK      | 5                     | 0.001              |
| Watanabe (2003) [65]       | 6              | MDCK      | 8                     | 0.001              |
| Wu (2008) [66]             | 1B             | MDCK      | 8                     | 0.001              |
| Yamada (2012) [55]         | 2              | MDCK      | 4                     | 0.001              |
| <b>WSN33 MDBK</b>          |                |           |                       |                    |
| Fodor (1998) [67]          | 2              | MDBK      | 6                     | 0.01               |
| Goto (2001) [68]           | 1              | MDBK      | 5                     | $1 \times 10^{-4}$ |
| Sun (2010) [69]            | 2B             | MDBK      | 7                     | 0.01               |
| Wang (2002) [70]           | 1B             | MDBK      | 7                     | 0.001              |
| Zheng (1996) [71]          | 6              | MDBK      | 6                     | 0.001              |

\* Refers to the figure numbers in the original paper.

<https://doi.org/10.1371/journal.pone.0192645.t001>

### Comparison of different influenza virus strains

Since we determined viral kinetics parameters for several different strains of influenza virus, influenza virus strains can be compared. Our analysis demonstrates that the estimated

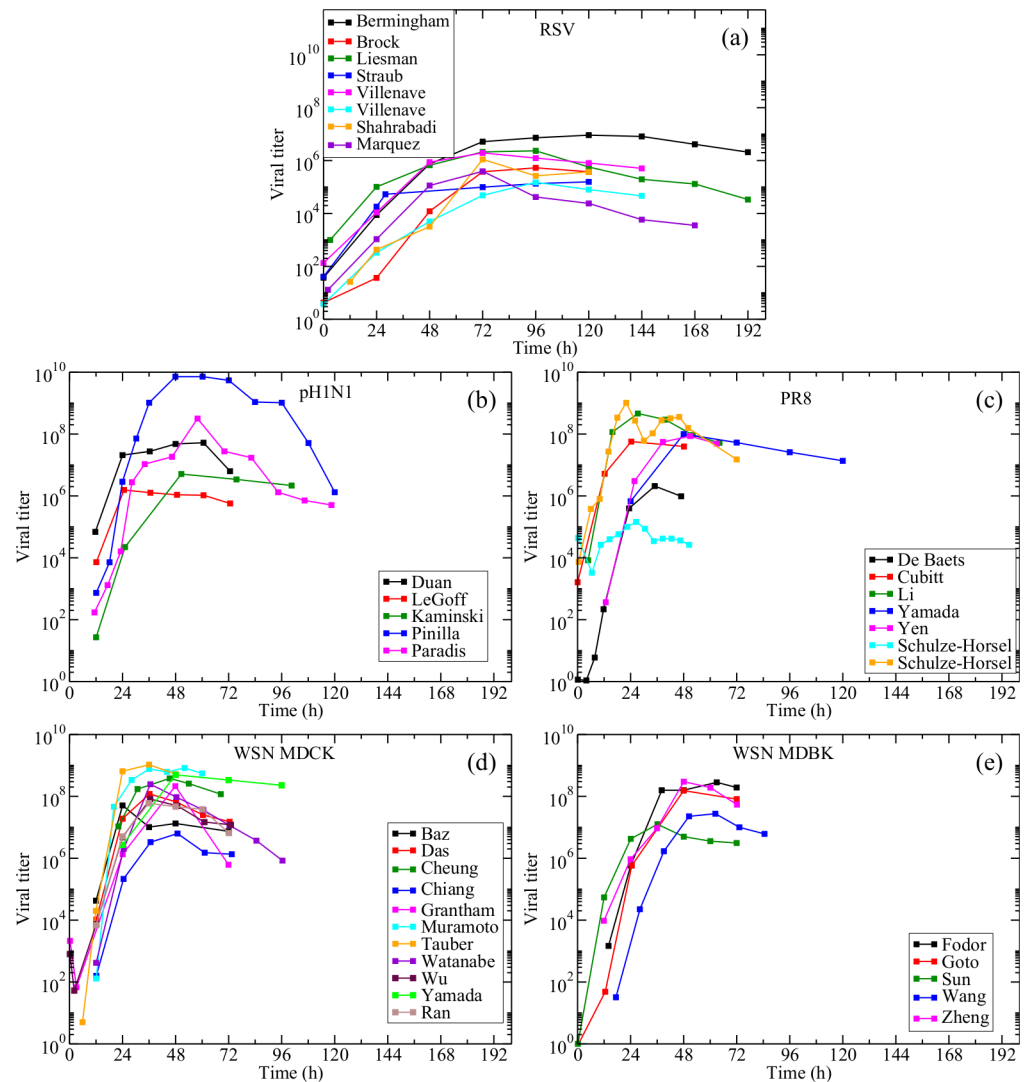

**Fig 2. Study data.** In vitro RSV and influenza virus infection data used in this study.

<https://doi.org/10.1371/journal.pone.0192645.g002>

parameters for different strains of influenza virus are quite consistent. We found no statistically significant differences between the parameters of the different influenza virus strains except that the median duration of the pH1N1 eclipse phase is lower than the median eclipse phase of PR8 (Fig 5). Given the recent finding that viral kinetics parameter estimates can vary substantially between experiments using the same strain in the same cell line [21], we see a remarkably good consistency in parameter estimates from different strains of influenza virus extracted from different experiments.

### The effect of cell type

Because it is well-known that the host cell line may have a major influence on the propagation of a virus infection [72–74], we investigated this effect by analysing the data of influenza virus studies in MDCK and MDBK cells. Our analysis demonstrated that the parameter values for WSN33 in either cell type are likely from the same distributions, suggesting that there is little difference between influenza virus infections in either MDCK or MDBK cells.



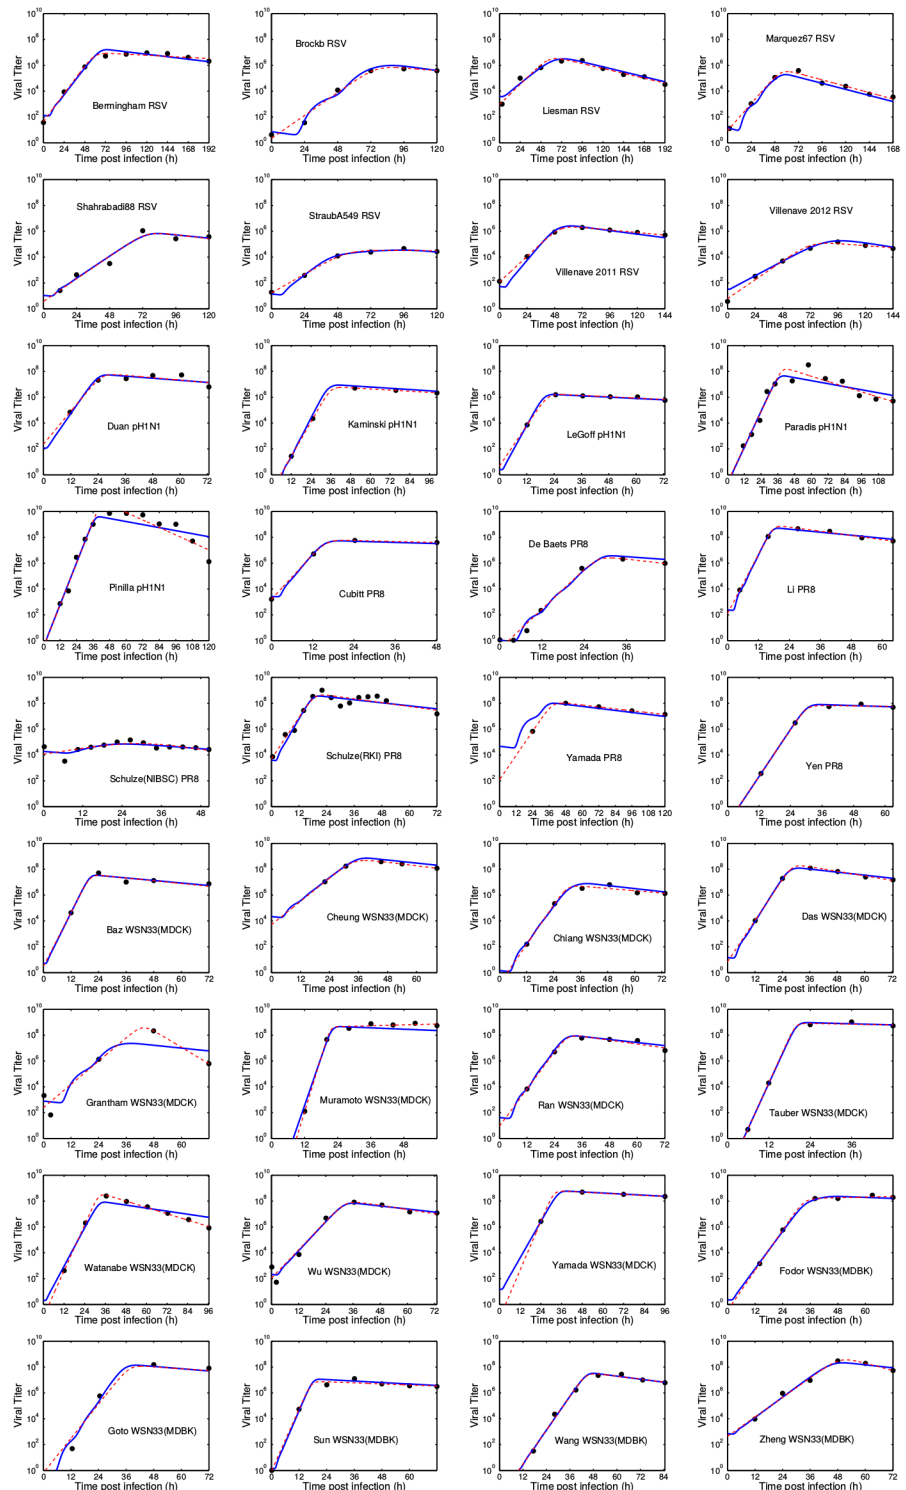

**Fig 3. Empirical and viral kinetics model fits.** We fit both the empirical model (Eq (1)) and the viral kinetics model (Eq (2)) to each of the RSV and influenza virus viral time courses. The best fit curves are shown in Fig 3 where the red dashed line represents the best fit empirical model and the blue solid line represents the best fit viral kinetics model. The extracted parameter values are presented in Table 2 for the empirical model and in Table 3 for the viral kinetics model.

<https://doi.org/10.1371/journal.pone.0192645.g003>

Table 2. Estimated parameter values for the empirical model (Eq (1)).

| Data              | $V_p$                 | $\lambda_g$ (IU/h) | $\lambda_d$ (IU/h)   | $t_p$ (h) | SSR                    | $\sqrt{MSE}$ |
|-------------------|-----------------------|--------------------|----------------------|-----------|------------------------|--------------|
| Birmingham        | $4.91 \times 10^6$    | 0.21               | 0.0081               | 59.4      | 0.194                  | 0.20         |
| Brock             | $4.71 \times 10^5$    | 0.17               | 0.027                | 76.2      | 0.433                  | 0.47         |
| Liesman           | $2.72 \times 10^6$    | 0.15               | 0.036                | 57.9      | 0.398                  | 0.28         |
| Marquez           | $2.67 \times 10^5$    | 0.20               | 0.048                | 54.8      | 0.156                  | 0.20         |
| Shahrabadi        | $5.19 \times 10^5$    | 0.17               | 0.030                | 74.9      | 0.716                  | 0.60         |
| Straub            | $1.84 \times 10^4$    | 0.14               | 0.0027               | 54.9      | 0.057                  | 0.17         |
| Villenave 2011    | $1.45 \times 10^6$    | 0.19               | 0.019                | 53.1      | 0.003                  | 0.055        |
| Villenave 2012    | $8.15 \times 10^4$    | 0.14               | 0.016                | 72.8      | 0.182                  | 0.25         |
| RSV median        | $3.93 \times 10^5$    | 0.18               | 0.023                | 56.4      | 0.169                  | 0.23         |
| Duan              | $3.59 \times 10^7$    | 0.49               | 0.036                | 25.9      | 0.36                   | 0.42         |
| Kaminski          | $3.30 \times 10^6$    | 0.51               | 0.017                | 36.2      | $1.05 \times 10^{-04}$ | 0.010        |
| LeGoff            | $9.38 \times 10^5$    | 0.61               | 0.020                | 21.3      | 0.015                  | 0.087        |
| Paradis           | $1.06 \times 10^8$    | 0.52               | 0.08                 | 39.2      | 2.34                   | 0.54         |
| Pinilla           | $3.19 \times 10^{10}$ | 0.63               | 0.11                 | 41.8      | 2.79                   | 0.59         |
| pH1N1 median      | $3.59 \times 10^7$    | 0.52               | 0.036                | 36.2      | 0.36                   | 0.42         |
| Cubitt*           | $3.26 \times 10^7$    | 0.67               | 0.016                | 16.0      | $1.04 \times 10^{-12}$ | -            |
| de Baets          | $1.80 \times 10^6$    | 0.59               | 0.071                | 28.0      | 0.97                   | 0.57         |
| Li                | $4.53 \times 10^8$    | 0.88               | 0.06                 | 18.0      | 0.015                  | 0.087        |
| Schulze 3a        | $7.68 \times 10^4$    | 0.093              | 0.084                | 28.0      | 1.18                   | 0.36         |
| Schulze 3b        | $2.91 \times 10^8$    | 0.62               | 0.057                | 18.9      | 1.58                   | 0.40         |
| Yamada            | $6.69 \times 10^7$    | 0.36               | 0.028                | 38.7      | $2.1 \times 10^{-4}$   | 0.014        |
| Yen               | $3.44 \times 10^7$    | 0.70               | 0.0054               | 30.2      | 0.031                  | 0.18         |
| PR8 median        | $3.44 \times 10^7$    | 0.62               | 0.057                | 28.0      | 0.031                  | 0.27         |
| Baz               | $1.98 \times 10^7$    | 0.80               | 0.04                 | 20.5      | 0.15                   | 0.39         |
| Cheung            | $3.50 \times 10^8$    | 0.35               | 0.052                | 34.2      | $2.7 \times 10^{-4}$   | 0.016        |
| Chiang            | $3.02 \times 10^6$    | 0.59               | 0.034                | 30.1      | 0.13                   | 0.25         |
| Das               | $1.28 \times 10^8$    | 0.61               | 0.067                | 28.5      | 0.092                  | 0.21         |
| Grantham          | $3.66 \times 10^8$    | 0.35               | 0.25                 | 43.1      | 1.9                    | 1.4          |
| Muramoto          | $2.19 \times 10^8$    | 1.61               | 0.013                | 21.4      | 0.074                  | 0.16         |
| Ran               | $5.87 \times 10^7$    | 0.55               | 0.06                 | 29.7      | 0.13                   | 0.25         |
| Tauber            | $4.11 \times 10^8$    | 1.37               | $8.9 \times 10^{-3}$ | 19.7      | 0.045                  | 0.21         |
| Watanabe          | $2.20 \times 10^8$    | 0.68               | 0.094                | 32.4      | 0.026                  | 0.080        |
| Wu                | $5.85 \times 10^7$    | 0.42               | 0.062                | 33.0      | 1.5                    | 0.62         |
| Yamada*           | $3.24 \times 10^8$    | 0.72               | 0.016                | 31.6      | $1.0 \times 10^{-12}$  | -            |
| WSN33 MDCK median | $2.19 \times 10^8$    | 0.61               | 0.052                | 30.1      | 0.092                  | 0.23         |
| Fodor             | $7.86 \times 10^7$    | 0.60               | -0.01                | 33.4      | 0.026                  | 0.11         |
| Goto              | $7.14 \times 10^7$    | 0.51               | 0.029                | 37.6      | 0.11                   | 0.33         |
| Sun               | $4.00 \times 10^6$    | 0.92               | 0.016                | 17.4      | 0.16                   | 0.23         |
| Wang              | $1.94 \times 10^7$    | 0.50               | 0.044                | 44.4      | 0.20                   | 0.62         |
| Zheng             | $3.28 \times 10^8$    | 0.29               | 0.011                | 49.2      | 0.16                   | 0.28         |
| WSN33 MDBK median | $7.14 \times 10^7$    | 0.51               | 0.029                | 37.6      | 0.16                   | 0.28         |

\* indicates data sets with only 4 data points where  $\sqrt{MSE}$  is undefined.

<https://doi.org/10.1371/journal.pone.0192645.t002>

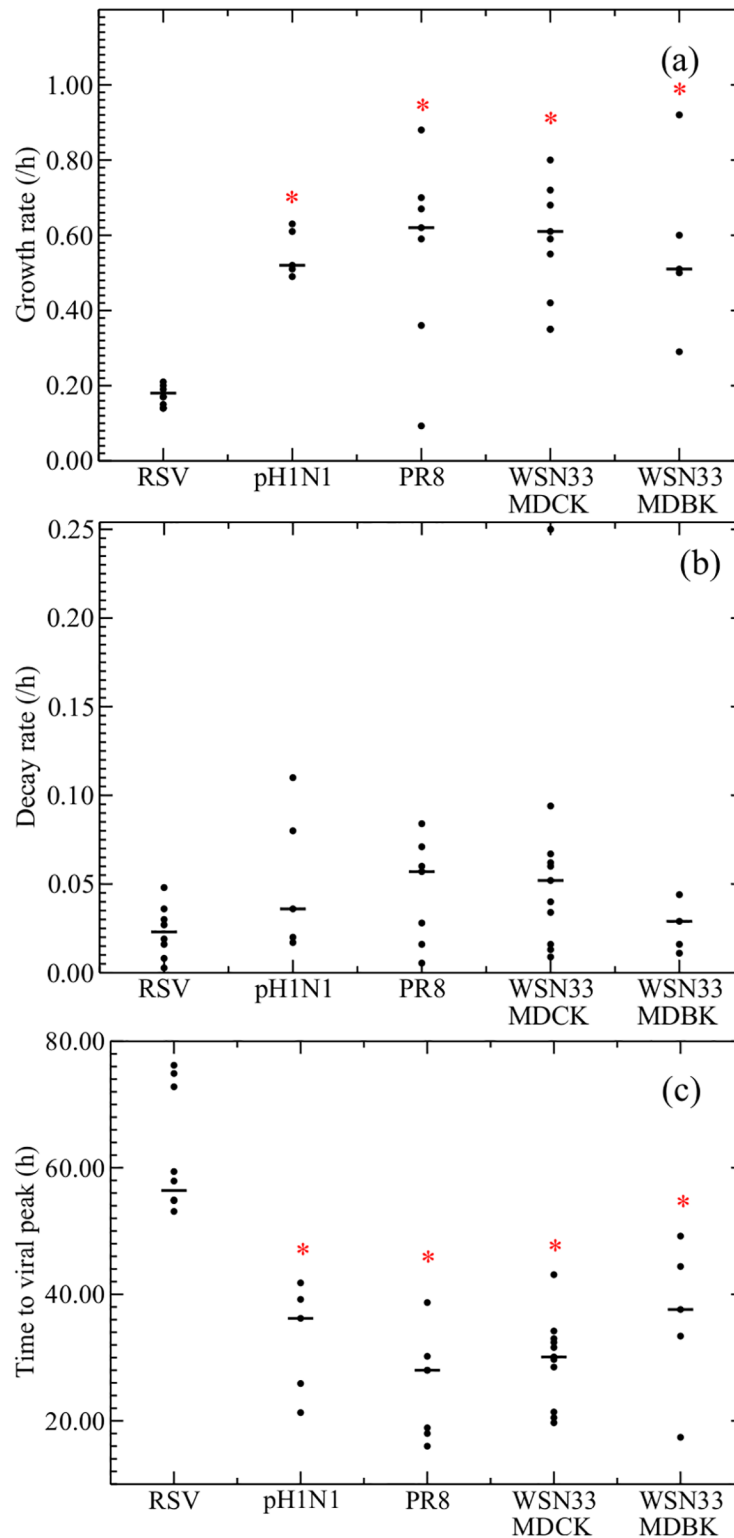

**Fig 4. Comparison of empirical model parameters.** Graphs show the distributions of (a) growth rate, (b) decay rate, (c) time to peak viral titer estimated from fits of the empirical model for RSV and the different strains of influenza virus. Statistically significant differences ( $p < 0.05$ ) between RSV and a particular influenza virus strain are indicated with an asterisk. The  $p$ -values for the Mann-Whitney test are given in Table 4. Median values are indicated with a solid black line.

<https://doi.org/10.1371/journal.pone.0192645.g004>

Table 3. Estimated parameter values for the viral kinetics model (Eq (2)).

| Data              | $t_{inf}$ (h) | $c$ (IU/h) | $\tau_I$ (h) | $\tau_E$ (h) | SSR   | $\sqrt{MSE}$ |
|-------------------|---------------|------------|--------------|--------------|-------|--------------|
| Birmingham        | 2.90          | 0.018      | 6.03         | 6.84         | 0.734 | 0.49         |
| Brock*            | 0.753         | 0.033      | 20.0         | 24.1         | 0.268 | –            |
| Liesman           | 8.49          | 0.037      | 14.3         | 1.12         | 0.645 | 0.47         |
| Marquez           | 1.28          | 0.045      | 9.27         | 13.3         | 0.508 | 0.50         |
| Shahrabadi*       | 3.57          | 0.024      | 4.57         | 6.01         | 0.710 | –            |
| Straub*           | 3.58          | 0.026      | 66.8         | 6.74         | 0.037 | –            |
| Villenave 2011*   | 3.09          | 0.027      | 17.0         | 4.75         | 0.310 | –            |
| Villenave 2012    | 4.70          | 0.037      | 2.00         | 1.03         | 0.984 | 0.99         |
| RSV median        | 3.33          | 0.030      | 11.8         | 6.38         | 0.576 | 0.50         |
| Duan*             | 1.64          | 0.031      | 4.04         | 1.07         | 0.437 | –            |
| Kaminski*         | 0.589         | 0.019      | 6.74         | 5.06         | 0.164 | –            |
| LeGoff*           | 1.22          | 0.020      | 4.07         | 1.12         | 0.018 | –            |
| Paradis           | 1.70          | 0.045      | 4.65         | 1.36         | 3.14  | 0.72         |
| Pinilla           | 1.36          | 0.045      | 2.15         | 1.05         | 6.07  | 1.0          |
| pH1N1 median      | 1.36          | 0.031      | 4.07         | 1.12         | 0.437 | 0.86         |
| Cubitt*           | 0.818         | 0.017      | 4.47         | 2.26         | 0.057 | –            |
| de Baets          | 0.374         | 0.045      | 2.03         | 5.75         | 0.760 | 0.87         |
| Li*               | 0.397         | 0.045      | 2.36         | 2.74         | 0.074 | –            |
| Schulze 3a        | 4.49          | 0.045      | 12.2         | 6.88         | 0.740 | 0.33         |
| Schulze 3b        | 0.867         | 0.045      | 2.73         | 2.04         | 1.84  | 0.48         |
| Yamada*           | 0.636         | 0.030      | 4.89         | 13.7         | 1.06  | –            |
| Yen*              | 1.11          | 0.015      | 4.48         | 1.64         | 0.038 | –            |
| PR8 median        | 0.818         | 0.045      | 4.47         | 2.74         | 0.740 | 0.48         |
| Baz*              | 0.996         | 0.037      | 2.18         | 1.04         | 0.154 | –            |
| Cheung*           | 1.47          | 0.045      | 2.88         | 4.52         | 0.125 | –            |
| Chiang*           | 0.538         | 0.045      | 9.15         | 5.78         | 0.245 | –            |
| Das*              | 0.718         | 0.045      | 5.17         | 3.31         | 0.040 | –            |
| Grantham*         | 1.64          | 0.030      | 19.4         | 4.08         | 3.78  | –            |
| Muramoto          | 0.482         | 0.020      | 2.78         | 1.01         | 0.854 | 0.92         |
| Ran*              | 0.474         | 0.045      | 4.69         | 5.68         | 0.204 | –            |
| Tauber*           | 0.449         | 0.017      | 2.79         | 1.28         | 0.054 | –            |
| Watanabe          | 1.53          | 0.045      | 2.35         | 1.04         | 1.38  | 0.83         |
| Wu                | 1.59          | 0.045      | 3.04         | 2.39         | 0.885 | 0.66         |
| Yamada*           | 1.72          | 0.016      | 3.54         | 1.22         | 0.001 | –            |
| WSN33 MDCK median | 0.996         | 0.045      | 3.04         | 2.39         | 0.204 | 0.83         |
| Fodor*            | 1.53          | 0.015      | 13.8         | 1.81         | 0.088 | –            |
| Goto*             | 0.326         | 0.034      | 6.01         | 6.71         | 0.603 | –            |
| Sun               | 0.663         | 0.022      | 2.72         | 1.60         | 0.272 | 0.52         |
| Wang              | 0.777         | 0.045      | 3.02         | 4.53         | 0.199 | 0.47         |
| Zheng*            | 2.15          | 0.045      | 2.16         | 2.29         | 0.246 | –            |
| WSN33 MDBK median | 0.777         | 0.034      | 3.02         | 2.29         | 0.246 | 0.50         |

\* indicates data sets with 6 or less data points where  $\sqrt{MSE}$  is undefined.

<https://doi.org/10.1371/journal.pone.0192645.t003>

**Table 4. Results of the Mann-Whitney tests (p-values).**

|                                                    | $\lambda_g$                            | $\lambda_d$ | $t_p$                                  | $t_{inf}$     | $\tau_I$     | $\tau_E$     | $c$  |
|----------------------------------------------------|----------------------------------------|-------------|----------------------------------------|---------------|--------------|--------------|------|
| <b>Comparing RSV and influenza virus strains</b>   |                                        |             |                                        |               |              |              |      |
| pH1N1                                              | <b>0.0034</b>                          | 0.19        | <b>0.013</b>                           | <b>0.047</b>  | 0.079        | 0.079        | 0.83 |
| PR8                                                | <b>0.021</b>                           | 0.16        | <b>0.0018</b>                          | <b>0.028</b>  | <b>0.049</b> | 0.64         | 0.52 |
| WSN33 MDCK                                         | <b><math>2.8 \times 10^{-4}</math></b> | 0.058       | <b><math>3.8 \times 10^{-4}</math></b> | <b>0.0064</b> | <b>0.048</b> | 0.058        | 0.32 |
| WSN33 MDBK                                         | <b>0.0034</b>                          | 0.56        | <b>0.013</b>                           | <b>0.0228</b> | 0.11         | 0.24         | 0.94 |
| <b>Comparing different influenza virus strains</b> |                                        |             |                                        |               |              |              |      |
| pH1N1/ PR8                                         | 0.46                                   | 0.68        | 0.17                                   | 0.17          | 0.94         | <b>0.028</b> | 0.87 |
| pH1N1/ WSN33                                       | 0.40                                   | 0.87        | 0.40                                   | 0.40          | 0.77         | 0.61         | 0.69 |
| PR8 / WSN33                                        | 0.75                                   | 0.89        | 0.13                                   | 0.50          | 0.82         | 0.19         | 0.89 |
| <b>Comparing the effect of cell type</b>           |                                        |             |                                        |               |              |              |      |
| MDCK / MDBK                                        | 0.40                                   | 0.46        | 0.13                                   | 0.95          | 0.87         | 0.40         | 0.46 |

<https://doi.org/10.1371/journal.pone.0192645.t004>

## Discussion

### Causes of the slower growth of RSV

This paper quantitatively examines the differences between in vitro RSV and influenza virus infection experiments. We found that RSV has a statistically significantly slower growth rate and later time to reach viral titer peak than influenza virus. While this was previously observed clinically [12], our study indicates that there are similar differences in vitro. Our use of a viral

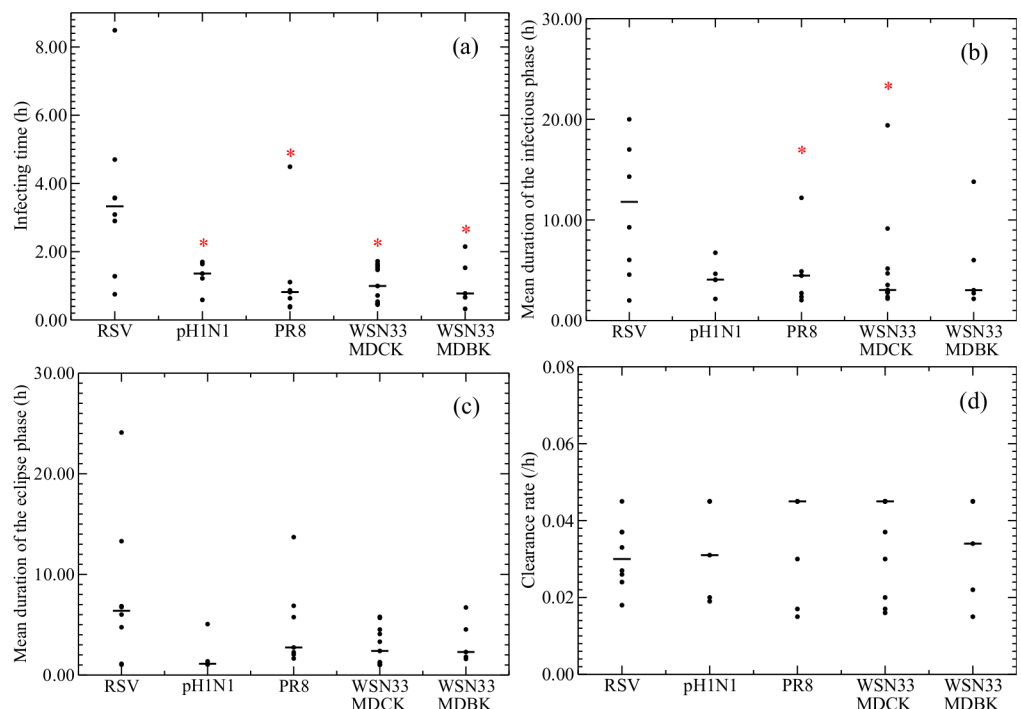

**Fig 5. Comparison of viral kinetics parameters.** Graphs show the distributions of (a) infecting time ( $t_{inf}$ ), (b) duration of the infectious phase ( $\tau_I$ ), (c) duration of the eclipse phase ( $\tau_E$ ), and (d) degradation rate ( $c$ ) estimated from fits of the gamma model for RSV and the different strains of influenza virus. Statistically significant differences ( $p < 0.05$ ) between RSV and a particular influenza virus strain are indicated with an asterisk. The  $p$ -values for the Mann-Whitney test are given in Table 4. Median values are indicated with a solid black line.

<https://doi.org/10.1371/journal.pone.0192645.g005>

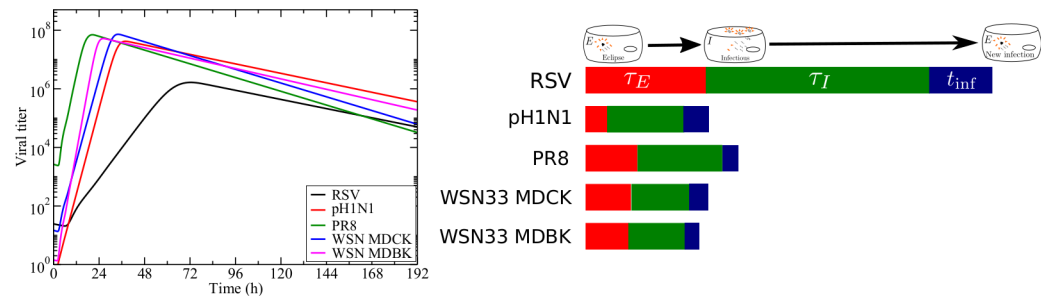

**Fig 6. Differences in infection time course.** (a) Predicted time courses of RSV, pH1N1, PR8, WSN33 MDCK, and WSN33 MDBK using the median values (Table 3) for each of the parameters in the viral kinetics model (Eq (2)). (b) A schematic diagram of the duration of different phases (using median values) of the viral replication cycle for RSV, pH1N1, PR8, WSN33 MDCK, and WSN33 MDBK.

<https://doi.org/10.1371/journal.pone.0192645.g006>

kinetics model also allowed examination of possible mechanisms for this observed difference. This analysis determined that RSV has a significantly longer infecting time ( $t_{inf}$ ) than influenza virus, providing a possible dynamical explanation for the observed slower growth rate. Since RSV takes longer to spread from an infectious cell to a new target cell, this will lead to an overall slower growth rate. While not statistically significant, the duration of the eclipse phase was also longer in RSV than in flu, which could also contribute to the slower growth of RSV. Finally, we found that RSV has a longer infectious lifespan than PR8 or WSN33 in MDCK cells, which could contribute to the longer propagation of RSV infection.

Our findings help explain some observations made during the in vivo comparison of influenza virus and RSV infections [12]. The slower growth rate and delayed time of peak titer in vivo are mirrored by a slower growth rate and delayed time to reach peak viral titer in vitro, suggesting that these features are not due to adaptive immune interactions of either virus, but are most likely a consequence of virus-cell interactions. Note that time of peak is known to depend on the initial viral inoculum [75], with lower MOI leading to a later time of peak. The influenza virus data used in this study uses a lower MOI than RSV, suggesting that the difference in time of peak viral titer would be greater if both infections were initiated with the same inoculum.

There are two fundamental processes included in the infecting time, movement of the virus from its originating cell to a new target cell and entry of the virus into the new target cell. While new imaging modalities allow tracking of virus particles during an infection [76–78], they have largely been used to track virions after they enter a target cell. One study, however, examined motion of swine influenza virus in porcine respiratory mucus finding that most of the virions (~70%) were immobilized in mucus, but the remaining 30% that traveled, moved through diffusion [79]. Thus comparison of diffusion coefficients might give an estimate of which virus is likely to travel between cells faster. RSV is twice as big as influenza virus (120–220 nm [80] versus 80–120 nm [81]), so we expect influenza virus to have a larger diffusion coefficient simply due to its smaller size. Note that other factors in the microenvironment of the virus, such as temperature and viscosity of the surrounding fluid, will also affect the diffusion coefficient as described by the Stokes-Einstein equation [82]. However, differences in temperature and viscosity in the in vitro environments of RSV and influenza virus are smaller than the difference in their size, so size is the most likely contributor to differences in the diffusion coefficient.

While differences in diffusion coefficient might play a role in increasing infecting time in vitro, influenza virus is known to be pleomorphic, with spherical forms dominating lab strains of the virus and filamentous forms more ubiquitous in vivo [83, 84]. The diffusion coefficient

of rods is less than that of spheres [85], possibly equalizing the diffusion rates of RSV and influenza virus *in vivo*. Additionally, motion of influenza virus is known to be affected by neuraminidase activity [79, 86, 87] which is altered as influenza virus changes from spherical to filamentous morphology [88]. Influenza virus binds to sialic acids found on mucins, preventing it from moving. These bonds are broken by neuraminidase, allowing influenza virus to return to its normal motion. Thus the more neuraminidase activity, the faster influenza virus will move through its surroundings.

The infecting time also includes entry of the virus into a new target cell. For influenza virus, the time for initial fusion of the hemagglutinin protein to the viral membrane is approximately 20–30 s with full pore formation occurring 10–30 s later [89–91], but similar measurements have not yet been made for RSV. While we are lacking some measurements of the duration of processes that contribute to the infecting time, the difference in diffusion coefficients between RSV and influenza virus could partially explain the differences in infecting times measured in this study. More detailed measurements of the time needed for RSV to enter a host cell, together with studies of intercellular virion motion are needed to form a complete picture of the mechanisms leading to the observed differences in infecting time.

### Other differences between RSV and influenza virus

There are a number of key differences in the life cycles of RSV and influenza virus that could also contribute to the differences we have found. An important biological difference between influenza virus and RSV is RSV's ability to form syncytia [92–94], although syncytia are much less observed *in vivo* than *in vitro* [93]. This feature is not explicitly included in our model, so its effect will be implicitly contained in the estimated values of the parameters. The effect of the syncytia is, in part, to alter the mode of transmission of virus, allowing them to move directly from cell to cell [95]. Differences in mode of transmission of the virus could also affect the observed infecting time.

Influenza virus and RSV also target different cells in the respiratory tract. RSV primarily targets ciliated cells in the bronchiolar and alveolar epithelium [47, 96–98], while human strains of influenza virus target primarily the non-ciliated cells [99]. These differences in cell tropism are caused by underlying differences in the distributions of receptors responsible for attachment for each of these viruses [100]. While cell type will not directly affect the time it takes for virions to move from one cell to another, it could alter the time it takes for a virion to attach to and fuse with the cell membrane, which would alter the infecting time. Additionally, the density of different cell types varies in the respiratory tract with studies indicating that the epithelium of the upper airway comprises 50–85% nonciliated cells [101, 102]. This means that the primary target cells for influenza virus are likely closer together than the primary target cells for RSV which would also lead to a lower infecting time for influenza virus. Interestingly, phases of the RSV and influenza virus life cycle that seem to be more dependent on cell type, such as the duration of the eclipse or infectious phases, are not consistently different between RSV and influenza virus. More complex models that include intracellular processes would aid to differentiate between RSV and influenza virus, but more detailed data is needed to accurately describe these processes [26, 103, 104].

Not only do influenza virus and RSV differ in the cells they target, but their cytopathic effects differ. A number of studies have noted that RSV has little cytopathic effect [97, 98, 105] *in vitro*, although *in vivo* columnar cell cytopathology and shedding of cellular debris seems to be a cause of bronchiolitis in young children [106]. Influenza virus, on the other hand, seems to be highly pathogenic in cells of the respiratory tract [107, 108]. Differences in cytopathology would likely manifest themselves in model parameters characterizing later stages of the

infection cycle such as the duration of the infectious phase. We do see some statistically significant differences in duration of the infectious phase between RSV and influenza virus, although it is not consistent across all strains of influenza virus.

In humans, unlike *in vitro* systems where there are static and limited innate immune responses (IR) present, the complex cellular, adapted and innate IRs *in vivo* could also lead to differences in infection dynamics between RSV and influenza virus. Several differences in the immune responses to influenza virus and RSV have already been observed. *In vitro*, experimental infection of A549 cells with either virus showed similar type I IFN responses [9]. However, experimental infection of lymphocytes and macrophages with either virus has resulted in different IFN responses [109, 110], and different interleukin responses [111, 112]. Differences between the immune response to RSV and influenza *in vivo* have also been observed such as differences in which cytokines are secreted [10], in the interferon response [9, 113], in the activation and proliferation of lymphocytes [114], and in the movement of dendritic cells and monocytes to the respiratory tract [11]. These different immune responses, particularly differences in the early innate immune response, could contribute to the observed differences in growth rate and time of peak. The extent to which immunological differences alter dynamics between the two diseases is something that needs further investigation, using experiments in the same cell line *in vitro* and animal models for direct comparison of the two infections.

### Limitations of the data

The data used in this analysis was collected from a variety of previously published experiments and so lacks consistency. It is known that viral kinetics parameters can vary substantially between experiments, even when the same virus and cell line is used and the experiment is done in the same lab [21], so our use of data from experiments done in different labs is not ideal. For example, the RSV experiments collected here are performed in different cell types. While our comparison of WSN33 viral kinetics parameters in MDCK and MDBK cells suggests that there is little change in our parameter estimates when cell type changes, other experiments have seen very different dynamics using other strains of influenza virus in these two types of cells [72–74]. Further experiments with influenza virus in other cell lines are needed to properly assess the effect of cell type. We also need to be careful in extrapolating these results to RSV where virus-cell interactions are different and might be more sensitive to changes in cell type. Experiments directly comparing the viral kinetics of RSV in different cell lines would allow us to determine how much using data from different cell lines has contributed to the variability of our measurements. To perform a fair comparison of RSV and influenza virus, we would ideally like to have data from infections of both viruses in the same type of cells. Since many influenza virus *in vitro* experiments are performed in MDCK cells, experimental infection of these cells with RSV would allow for a good comparison of viral kinetics parameters. RSV is known to infect MDCK cells [115–118], so this would provide a consistent substrate for comparing influenza virus and RSV.

Our use of data from specific RSV and influenza virus strains might not be reflective for all strains. It is known that the RSV A2 strain differs in viral load and pathology from other RSV strains [119, 120]. It is also demonstrated that variations in the amino acid sequence of envelope proteins may contribute to differences in infection time. It has been shown for instance that drug-induced mutations in RSV F seem to result in differences in viral infection rate [121, 122]. Moreover, two studies investigating the fitness of an influenza virus drug-resistant strain demonstrated that although the strain seemed to display equal fitness as compared to the wild-type strain, the mutation caused subtle differences in the viral kinetics, lengthening one phase



but shortening another, such that the net effect is that there is little discernible difference in the viral titers of the two influenza virus strains [20, 21].

A further limitation of this study is the limited amount of information in each individual data set. While several of the viral kinetics parameters have been previously estimated for in vitro influenza virus infections, some of our values do not agree well with these estimates. The infecting time was estimated to be 0.08–1.5 h in several different in vitro experiments using different influenza virus strains [20, 37, 123, 124]. Our median estimates all lie within this range. Previous estimates of the duration of the eclipse phase obtained in vitro range from 4–11 h [20, 21, 35, 123, 125, 126]. Our median estimates are quite a bit shorter than previous results. The duration of the infectious phase for influenza virus has also been measured before, with estimates ranging from 10.5–49 h [20, 21, 35, 37], which are again longer than our median estimates for  $\tau_I$ . This discrepancy is likely due to identifiability issues particularly for the viral kinetics model. For the empirical model, which has four free parameters, two of the data sets only had four data points, limiting the reliability of the parameter estimates. The situation is even worse for the viral kinetics model, which has six free parameters. In this case, 22 of the 36 data sets used here had 6 or fewer data points, meaning that some of the parameter estimates are unreliable. This could be the cause of the broad distributions of parameter estimates we find for  $\tau_E$  and  $\tau_I$ , leading to difficult in measuring significant differences in these quantities. It is well-known that viral time course alone will not allow for unique identification of all the parameters in the viral kinetics model [39, 127, 128]. Additional data from single-cycle experiments [20, 21], or from measurements of RNA [128] will help improve confidence in our parameter estimates. Even simple improvements such as measuring more often for a longer time will increase reliability of our estimates. While we limited our data sets to those that contained both growth and decay of virus, several of these experiments had only two points in one of those phases. With the inherent error in viral titer measurements [129, 130], the limited number of data points in each time course leads to error in the viral kinetics parameter estimates.

## Conclusion

In summary, our analysis has found differences between influenza virus and RSV dynamics in vitro that are consistent with observed differences in influenza virus and RSV dynamics in vivo [12]. Our finding of differences in infecting time suggests a possible mechanism at the virus-cell level for the differences observed in vivo and in vitro. The mechanism of different infecting times is supported by known differences in the diffusion rates of the two viruses, although this is not the only factor that determines infecting time. More consistent experiments, as suggested in the discussion, should further help develop our understanding of the differences in RSV and influenza virus dynamics.

## Acknowledgments

Filip De Ridder, Dymphy Huntjens, Dirk Roymans, and Gabriela Ispas are employees of Janssen R&D Belgium. Hana M. Dobrovoly received funding from Janssen R&D Belgium, and Gilberto Gonzalez-Parra's salary was paid by a grant from Janssen R&D Belgium.

## Author Contributions

**Conceptualization:** Filip De Ridder.

**Data curation:** Gilberto González-Parra, Hana M. Dobrovoly.

**Formal analysis:** Gilberto González-Parra, Hana M. Dobrovoly.

**Investigation:** Gilberto González-Parra.

**Methodology:** Filip De Ridder, Dymphy Huntjens, Dirk Roymans.

**Project administration:** Gabriela Ispas.

**Resources:** Gabriela Ispas.

**Software:** Gilberto González-Parra.

**Supervision:** Hana M. Dobrovolny.

**Validation:** Hana M. Dobrovolny.

**Writing – original draft:** Hana M. Dobrovolny.

**Writing – review & editing:** Filip De Ridder, Dymphy Huntjens, Dirk Roymans, Gabriela Ispas, Hana M. Dobrovolny.

## References

1. Pavia AT. Viral Infections of the Lower Respiratory Tract: Old Viruses, New Viruses, and the Role of Diagnosis. *Clin Infect Dis*. 2011; 52(S4):S284–S289. <https://doi.org/10.1093/cid/cir043> PMID: 21460286
2. Goka EA, Vallely PJ, Mutton KJ, Klapper PE. Single, dual and multiple respiratory virus infections and risk of hospitalization and mortality. *Epidemiol Infect*. 2015; 143(1):37–47. <https://doi.org/10.1017/S0950268814000302> PMID: 24568719
3. Monto A, Sullivan K. Acute Respiratory Illness in the Community—Frequency of Illness and the Agents Involved. *Epidemiol Infect*. 1993; 110(1):145–160. <https://doi.org/10.1017/S0950268800050779> PMID: 8432318
4. Caul EO, Waller DK, Clarke SKR, Corner BD. A Comparison of Influenza and Respiratory Syncytial Virus Infections among Infants Admitted to Hospital with Acute Respiratory Infections. *J Hyg*. 1976; 77(3):383–392. <https://doi.org/10.1017/S0022172400055765> PMID: 1069818
5. Fleming DM, Pannell RS, Cross KW. Mortality in children from influenza and respiratory syncytial virus. *J Epidemiol Community Health*. 2005; 59:586–590. PMID: 15965143
6. Meury S, Zeller S, Heininger U. Comparison of clinical characteristics of influenza and respiratory syncytial virus infection in hospitalised children and adolescents. *Eur J Pediatr*. 2004; 163:359–363. <https://doi.org/10.1007/s00431-004-1445-6> PMID: 15106003
7. Bosis S, Esposito S, Niesters HGM, Crovari P, Osterhaus ADME, Principi N. Impact of Human Metapneumovirus in Childhood: Comparison With Respiratory Syncytial Virus and Influenza Viruses. *J Med Virol*. 2005; 75:101–104. <https://doi.org/10.1002/jmv.20243> PMID: 15543589
8. Garofalo RP, Hintz KH, Hill V, Patti J, Ogra PL, Robert C Welliver S. A Comparison of Epidemiologic and Immunologic Features of Bronchiolitis Caused by Influenza Virus and Respiratory Syncytial Virus. *J Med Virol*. 2005; 75:282–289. <https://doi.org/10.1002/jmv.20268> PMID: 15602730
9. Jewell NA, Vaghefi N, Mertz SE, Akter P, R Stokes Peebles J, Bakaletz LO, et al. Differential Type I Interferon Induction by Respiratory Syncytial Virus and Influenza A Virus In Vivo. *J Virol*. 2007; 81(18):9790–9800. <https://doi.org/10.1128/JVI.00530-07> PMID: 17626092
10. Sung RYT, Hui SHL, Wong CK, Lam CWK, Yin J. A comparison of cytokine responses in respiratory syncytial virus and influenza A infections in infants. *Eur J Pediatr*. 2001; 160:117–122. <https://doi.org/10.1007/s004310000676> PMID: 11271383
11. Gill MA, Long K, Kwon T, Muniz L, Mejias A, Connolly J, et al. Differential Recruitment of Dendritic Cells and Monocytes to Respiratory Mucosal Sites in Children with Influenza Virus or Respiratory Syncytial Virus Infection. *J Infect Dis*. 2008; 192:1667–1676. <https://doi.org/10.1086/593018>
12. Bagga B, Woods CW, Veldman TH, Gilbert A, Mann A, Balaratnam G, et al. Comparing influenza and RSV viral disease dynamics in experimentally infected adults predicts clinical effectiveness of RSV antivirals. *Antivir Ther*. 2013; 18:785–791. <https://doi.org/10.3851/IMP2629> PMID: 23714753
13. Loregian A, Mercorelli B, Nannetti G, Compagnin C, Palu G. Antiviral strategies against influenza virus: towards new therapeutic approaches. *Cell Mol Life Sci*. 2014; 71(19):3659–3683. <https://doi.org/10.1007/s00018-014-1615-2> PMID: 24699705

14. Cheng CK, Tsai CH, Shie JJ, Fang JM. From neuraminidase inhibitors to conjugates: a step towards better anti-influenza drugs? *Future Med Chem.* 2014; 6(7):757–774. <https://doi.org/10.4155/fmc.14.30> PMID: 24941871
15. Collins PL, Melero JA. Progress in understanding and controlling respiratory syncytial virus: Still crazy after all these years. *Virus Res.* 2011; 162(1–2):80–99. <https://doi.org/10.1016/j.virusres.2011.09.020> PMID: 21963675
16. Simões EAF, DeVincenzo JP, Boeckh M, Bont L, James E Crowe J, Griffiths P, et al. Challenges and Opportunities in Developing Respiratory Syncytial Virus Therapeutics. *J Infect Dis.* 2015; 211(S1):S1–S20. <https://doi.org/10.1093/infdis/jiu828> PMID: 25713060
17. Ispas G, Koul A, Verbeeck J, Sheehan J, Sanders-Beer B, Roymans D, et al. Antiviral Activity of TMC353121, a Respiratory Syncytial Virus (RSV) Fusion Inhibitor, in a Non-Human Primate Model. *PLOS One.* 2015; 10(5):e0126959. <https://doi.org/10.1371/journal.pone.0126959> PMID: 26010881
18. DeVincenzo JP, Whitley RJ, Mackman RL, Scaglioni-Weinlich C, Harrison L, Farrell E, et al. Oral GS-5806 Activity in a Respiratory Syncytial Virus Challenge Study. *N Engl J Med.* 2014; 371(8):711–722. <https://doi.org/10.1056/NEJMoa1401184> PMID: 25140957
19. DeVincenzo JP, McClure MW, Symons JA, Fathi H, Westland C, Chanda S, et al. Activity of Oral ALS-008176 in a Respiratory Syncytial Virus Challenge Study. *N Engl J Med.* 2015; 373(21):2048–2058F. <https://doi.org/10.1056/NEJMoa1413275> PMID: 26580997
20. Pinilla LT, Holder BP, Abed Y, Boivin G, Beauchemin CAA. The H275Y Neuraminidase Mutation of the Pandemic A/H1N1 Influenza Virus Lengthens the Eclipse Phase and Reduces Viral Output of Infected Cells, Potentially Compromising Fitness in Ferrets. *J Virol.* 2012; 86(19):10651–10660. <https://doi.org/10.1128/JVI.07244-11> PMID: 22837199
21. Paradis EG, Pinilla LT, Holder BP, Abed Y, Boivin G, Beauchemin CAA. Impact of the H275Y and I223V Mutations in the Neuraminidase of the 2009 Pandemic Influenza Virus In Vitro and Evaluating Experimental Reproducibility. *PLOS One.* 2015; 10(5):e0126115. <https://doi.org/10.1371/journal.pone.0126115> PMID: 25992792
22. Simon PF, de La Vega MA, Paradis É, Mendoza E, Coombs KM, Kobasa D, et al. Avian influenza viruses that cause highly virulent infections in humans exhibit distinct replicative properties in contrast to human H1N1 viruses. *Sci Rep.* 2016; 6:24154. <https://doi.org/10.1038/srep24154> PMID: 27080193
23. Dobrovolny HM, Baron MJ, Gieschke R, Davies BE, Jumbe NL, Beauchemin CAA. Exploring cell tropism as a possible contributor to influenza infection severity. *PLoS ONE.* 2010; 5(11):e13811. <https://doi.org/10.1371/journal.pone.0013811> PMID: 21124892
24. Handel A, Longini IM, Antia R. Antiviral resistance and the control of pandemic influenza: The roles of stochasticity, evolution and model details. *J Theor Biol.* 2009; 256:117–125. <https://doi.org/10.1016/j.jtbi.2008.09.021> PMID: 18952105
25. Canini L, Conway JM, Perelson AS, Carrat F. Impact of Different Oseltamivir Regimens on Treating Influenza A Virus Infection and Resistance Emergence: Insights from a Modelling Study. *PLoS Computational Biology.* 2014; 10(4):e1003568. <https://doi.org/10.1371/journal.pcbi.1003568> PMID: 24743564
26. Heldt FS, Frensing T, Pflugmacher A, Gropler R, Peschel B, Reichl U. Multiscale Modeling of Influenza A Virus Infection Supports the Development of Direct-Acting Antivirals. *PLoS Comput Biol.* 2013; 9(11):e1003372. <https://doi.org/10.1371/journal.pcbi.1003372> PMID: 24278009
27. Bocharov GA, Romanyukha AA. Mathematical model of antiviral immune response III. Influenza A virus infection. *J Theor Biol.* 1994; 167(4):323–360. <https://doi.org/10.1006/jtbi.1994.1074> PMID: 7516024
28. Hancioglu B, Swigon D, Clermont G. A dynamical model of human immune response to influenza A virus infection. *J Theor Biol.* 2007; 246(1):70–86. <https://doi.org/10.1016/j.jtbi.2006.12.015> PMID: 17266989
29. Price I, Mochan-Keef ED, Swigon D, Ermentrout GB, Lukens S, Toapanta FR, et al. The inflammatory response to influenza A virus (H1N1): An experimental and mathematical study. *J Theor Biol.* 2015; 374:83–93. <https://doi.org/10.1016/j.jtbi.2015.03.017> PMID: 25843213
30. Canini L, Carrat F. Population Modeling of Influenza A/H1N1 Virus Kinetics and Symptom Dynamics. *J Virol.* 2011; 85(6):2764–2770. <https://doi.org/10.1128/JVI.01318-10> PMID: 21191031
31. Reddy MB, Yang KH, Rao G, Rayner CR, Nie J, Pamulapati C, et al. Oseltamivir Population Pharmacokinetics in the Ferret: Model Application for Pharmacokinetic/Pharmacodynamic Study Design. *Plos One.* 2015; 10(10):e0138069. <https://doi.org/10.1371/journal.pone.0138069> PMID: 26460484
32. Parrott N, Davies B, Hoffmann G, Koerner A, Lave T, Prinssen E, et al. Development of a Physiologically Based Model for Oseltamivir and Simulation of Pharmacokinetics in Neonates and Infants. *Clin Pharmacokinet.* 2011; 50(9):613–623. <https://doi.org/10.2165/11592640-000000000-00000> PMID: 21827216

33. Beggs NF, Dobrovolny HM. Determining drug efficacy parameters for mathematical models of influenza. *J Biol Dynamics*. 2015; 9(S1):332–346. <https://doi.org/10.1080/17513758.2015.1052764>
34. Koizumi Y, Iwami S. Mathematical modeling of multi-drugs therapy: a challenge for determining the optimal combinations of antiviral drugs. *Theor Biol Med Model*. 2014; 11:41. <https://doi.org/10.1186/1742-4682-11-41> PMID: 25252828
35. Holder BP, Beauchemin CAA. Exploring the effect of biological delays in kinetic models of influenza within a host or cell culture. *BMC Public Health*. 2011; 11(S1):S10. <https://doi.org/10.1186/1471-2458-11-S1-S10> PMID: 21356129
36. Baccam P, Beauchemin C, Macken CA, Hayden FG, Perelson AS. Kinetics of influenza A virus infection in humans. *J Virol*. 2006; 80(15):7590–7599. <https://doi.org/10.1128/JVI.01623-05> PMID: 16840338
37. Beauchemin CAA, McSharry JJ, Drusano GL, Nguyen JT, Went GT, Ribeiro RM, et al. Modeling amantadine treatment of influenza A virus in vitro. *J Theor Biol*. 2008; 254:439–451. <https://doi.org/10.1016/j.jtbi.2008.05.031> PMID: 18653201
38. Kakizoe Y, Nakaoka S, Beauchemin CAA, Morita S, Mori H, Igarashi T, et al. A method to determine the duration of the eclipse phase for in vitro infection with a highly pathogenic SHIV strain. *Scientific Reports*. 2015; 5:10371. <https://doi.org/10.1038/srep10371> PMID: 25996439
39. Miao H, Xia X, Perelson AS, Wu H. On Identifiability of Nonlinear ODE Models and Applications in Viral Dynamics. *SIAM Review*. 2011; 53(1):3–39. <https://doi.org/10.1137/090757009> PMID: 21785515
40. Bermingham A, Collins PL. The M2–2 protein of human respiratory syncytial virus is a regulatory factor involved in the balance between RNA replication and transcription. *Proc Natl Acad Sci USA*. 1999; 99:11259–11264. <https://doi.org/10.1073/pnas.96.20.11259>
41. Brock SC, Goldenring JR, James E Crowe J. Apical recycling systems regulate directional budding of respiratory syncytial virus from polarized epithelial cells. *Proc Natl Acad Sci USA*. 2003; 100(25):15143–15148. <https://doi.org/10.1073/pnas.2434327100> PMID: 14630951
42. Liesman RM, Buchholz UJ, Luongo CL, Yang L, Proia AD, DeVincenzo JP, et al. RSV-encoded NS2 promotes epithelial cell shedding and distal airway obstruction. *J Clin Invest*. 2014; 124(5):2219–2233. <https://doi.org/10.1172/JCI72948> PMID: 24713657
43. Marquez A, Hsiung GD. Influence of glutamine on multiplication and cytopathic effect of respiratory syncytial virus. *Proc Soc Exp Biol Med*. 1967; 124:95–99. <https://doi.org/10.3181/00379727-124-31674> PMID: 6017798
44. Shahrabadi MS, Lee PWK. Calcium Requirement for Syncytium Formation in HEp-2 Cells by Respiratory Syncytial Virus. *J Clin Microbiol*. 1988; 26(1):139–131. PMID: 3343306
45. Straub CP, Lau WH, Preston FM, Headlam MJ, Gorman JJ, Collins PL, et al. Mutation of the elongin C binding domain of human respiratory syncytial virus non-structural protein 1 (NS1) results in degradation of NS1 and attenuation of the virus. *Virol J*. 2011; 8:252. <https://doi.org/10.1186/1743-422X-8-252> PMID: 21600055
46. Villenave R, O'Donoghue D, Thavagnanam S, Touzelet O, Skibinski G, Heaney LG, et al. Differential cytopathogenesis of respiratory syncytial virus prototypic and clinical isolates in primary pediatric bronchial epithelial cells. *Virol J*. 2011; 8:43. <https://doi.org/10.1186/1743-422X-8-43> PMID: 21272337
47. Villenave R, Thavagnanam S, Sarlang S, Parker J, Douglas I, Skibinski G, et al. In vitro modeling of respiratory syncytial virus infection of pediatric bronchial epithelium, the primary target of infection in vivo. *Proc Natl Acad Sci USA*. 2012; 109(13):5040–5045. <https://doi.org/10.1073/pnas.1110203109> PMID: 22411804
48. Duan S, Boltz DA, Seiler P, Li J, Bragstad K, Nielsen LP, et al. Oseltamivir—Resistant Pandemic H1N1/2009 Influenza Virus Possesses Lower Transmissibility and Fitness in Ferrets. *PLoS Path*. 2010; 6(7):e1001022. <https://doi.org/10.1371/journal.ppat.1001022>
49. Kaminski MM, Ohnemus A, Staeheli P, Rubbenstroth D. Pandemic 2009 H1N1 Influenza A Virus Carrying a Q136K Mutation in the Neuraminidase Gene Is Resistant to Zanamivir but Exhibits Reduced Fitness in the Guinea Pig Transmission Model. *J Virol*. 2013; 87(3):1912–1915. <https://doi.org/10.1128/JVI.02507-12> PMID: 23192869
50. LeGoff J, Rousset D, Abou-Jaoude G, Scemla A, Ribaud P, Mercier-Delarue S, et al. I223R Mutation in Influenza A(H1N1)pdm09 Neuraminidase Confers Reduced Susceptibility to Oseltamivir and Zanamivir and Enhanced Resistance with H275Y. *PLOS One*. 2012; 7(8):e0037095. <https://doi.org/10.1371/journal.pone.0037095>
51. Cubitt B, de la Torre JC. Amantadine does not have antiviral activity against Borna disease virus. *Arch Virol*. 1997; 142:2035–2042. <https://doi.org/10.1007/s007050050220> PMID: 9413511

52. De Baets S, Schepens B, Sedeyn K, Schotsaert M, Roose K, Bogaert P, et al. Recombinant Influenza Virus Carrying the Respiratory Syncytial Virus (RSV) F 85–93 CTL Epitope Reduces RSV Replication in Mice. *J Virol.* 2013; 87(6):3314–3323. <https://doi.org/10.1128/JVI.03019-12> PMID: 23302879
53. Li Y, Lu X, Li J, Bérubé N, Giest KL, Liu Q, et al. Genetically Engineered, Biarsenically Labeled Influenza Virus Allows Visualization of Viral NS1 Protein in Living Cells. *J Virol.* 2010; 84(14):7204–7213. <https://doi.org/10.1128/JVI.00203-10> PMID: 20463066
54. Schulze-Horsel J, Schulze M, Agalaridis G, Genzel Y, Reichl U. Infection dynamics and virus-induced apoptosis in cell culture-based influenza vaccine production—Flow cytometry and mathematical modeling. *Vaccine.* 2009; 27:2712–2722. <https://doi.org/10.1016/j.vaccine.2009.02.027> PMID: 19428884
55. Yamada H, Moriishi E, Haredy AM, Takenaka N, Mori Y, Yamanishi K, et al. Influenza virus neuraminidase contributes to the dextran sulfate-dependent suppressive replication of some influenza A virus strains. *Antiviral Res.* 2012; 96(3):344–352. <https://doi.org/10.1016/j.antiviral.2012.09.012> PMID: 23022352
56. Yen HL, Ilyushina NA, Salomon R, Hoffmann E, Webster RG, Govorkova EA. Neuraminidase Inhibitor-Resistant Recombinant A/Vietnam/1203/04 (H5N1) Influenza Viruses Retain Their Replication Efficiency and Pathogenicity In Vitro and In Vivo. *J Virol.* 2007; 81(22):12418–12426. <https://doi.org/10.1128/JVI.01067-07> PMID: 17855542
57. Baz M, Abed Y, Simon P, Hamelin ME, Boivin G. Effect of the Neuraminidase Mutation H274Y Confering Resistance to Oseltamivir on the Replicative Capacity and Virulence of Old and Recent Human Influenza A(H1N1) Viruses. *J Infect Dis.* 2010; 201:740–745. <https://doi.org/10.1086/650464> PMID: 20100088
58. Cheung TKW, Guan Y, Ng SSF, Chen H, Wong CHK, Peiris JSM, et al. Generation of recombinant influenza A virus without M2 ion-channel protein by introduction of a point mutation at the 59 end of the viral intron. *J Gen Virol.* 2005; 86:1447–1454. <https://doi.org/10.1099/vir.0.80727-0> PMID: 15831957
59. Chiang C, Chen GW, Shih SR. Mutations at Alternative 5J Splice Sites of M1 mRNA Negatively Affect Influenza A Virus Viability and Growth Rate. *J Virol.* 2008; 82(21):10873–10886. <https://doi.org/10.1128/JVI.00506-08> PMID: 18768984
60. Das SC, Watanabe S, Hatta M, Noda T, Neumann G, Ozawa M, et al. The Highly Conserved Arginine Residues at Positions 76 through 78 of Influenza A Virus Matrix Protein M1 Play an Important Role in Viral Replication by Affecting the Intracellular Localization of M1. *J Virol.* 2012; 86(3):1522–1530. <https://doi.org/10.1128/JVI.06230-11> PMID: 22090133
61. Grantham ML, Wu WH, Lalime EN, Lorenzo ME, Klein SL, Pekosz A. Palmitoylation of the Influenza A Virus M2 Protein Is Not Required for Virus Replication In Vitro but Contributes to Virus Virulence. *J Virol.* 2009; 83(17):8655–8661. <https://doi.org/10.1128/JVI.01129-09> PMID: 19553312
62. Muramoto Y, Noda T, Kawakami E, Akkina R, Kawaoka Y. Identification of Novel Influenza A Virus Proteins Translated from PA mRNA. *J Virol.* 2013; 87(5):2455–2462. <https://doi.org/10.1128/JVI.02656-12> PMID: 23236060
63. Ran Z, Chen Y, Shen H, Xiang X, Liu Q, Bawa B, et al. In vitro and in vivo replication of influenza A H1N1 WSN33 viruses with different M1 proteins. *J Gen Virol.* 2013; 94:884–895. <https://doi.org/10.1099/vir.0.046219-0> PMID: 23255622
64. Tauber S, Ligertwood Y, Quigg-Nicol M, Dutia BM, Elliott RM. Behaviour of influenza A viruses differentially expressing segment 2 gene products in vitro and in vivo. *J Gen Virol.* 2012; 93:840–849. <https://doi.org/10.1099/vir.0.039966-0> PMID: 22190016
65. Watanabe T, Watanabe S, Noda T, Fujii Y, Kawaoka Y. Exploitation of Nucleic Acid Packaging Signals To Generate a Novel Influenza Virus-Based Vector Stably Expressing Two Foreign Genes. *J Virol.* 2003; 77(19):10575–10583. <https://doi.org/10.1128/JVI.77.19.10575-10583.2003> PMID: 12970442
66. Wu WH, Pekosz A. Extending the Cytoplasmic Tail of the Influenza A Virus M2 Protein Leads to Reduced Virus Replication In Vivo but Not In Vitro. *J Virol.* 2008; 82(2):1059–1063. <https://doi.org/10.1128/JVI.01499-07> PMID: 17989186
67. Fodor E, Palese P, Brownlee GG, García-Sastre A. Attenuation of Influenza A Virus mRNA Levels by Promoter Mutations. *J Virol.* 1998; 72(8):6283–6290. PMID: 9658066
68. Goto H, Wells K, Takada A, Kawaoka Y. Plasminogen-Binding Activity of Neuraminidase Determines the Pathogenicity of Influenza A Virus. *J Virol.* 2001; 75(19):9297–9301. <https://doi.org/10.1128/JVI.75.19.9297-9301.2001> PMID: 11533192
69. Sun X, Tse LV, Ferguson AD, Whittaker GR. Modifications to the Hemagglutinin Cleavage Site Control the Virulence of a Neurotropic H1N1 Influenza Virus. *J Virol.* 2010; 84(17):8683–8690. <https://doi.org/10.1128/JVI.00797-10> PMID: 20554779

70. Wang X, Basler CF, Williams BRG, Silverman RH, Palese P, García-Sastre A. Viral Shedding and Immune Responses to Respiratory Syncytial Virus Infection in Older Adults. *Functional Replacement of the Carboxy-Terminal Two-Thirds of the Influenza A Virus NS1 Protein with Short Heterologous Dimerization Domains*. *J Virol*. 2002; 76(24):12951–12962.
71. Zheng H, Palese P, García-Sastre A. Nonconserved Nucleotides at the 3' and 5' Ends of an Influenza A Virus RNA Play an Important Role in Viral RNA Replication. *Virology*. 1996; 217:0111. <https://doi.org/10.1006/viro.1996.0111>
72. Rott R, Orlich M, Kienk HD, Wang ML, Skehel JJ, Wiley DC. Studies on the adaptation of influenza viruses to MDCK cells. *EMBO J*. 1984; 3(13):3329–3332. PMID: [6526017](https://pubmed.ncbi.nlm.nih.gov/6526017/)
73. Lin YP, Wharton SA, Marton J, Skehel JJ, Wiley DC, Steinhauer DA. Adaptation of Egg-Grown and Transfectant Influenza Viruses for Growth in Mammalian Cells: Selection of Hemagglutinin Mutants with Elevated pH of Membrane Fusion. *Virology*. 1997; 233:402–410. <https://doi.org/10.1006/viro.1997.8626>
74. Rozek W, Skulmowska-Kryszkowska D, Zmudzinski JF. Kinetics of replication of equine influenza viruses in chicken embryos and selected cell lines. *Bull Vet Inst Pulawy*. 1998; 42(1):11–20.
75. Li Y, Handel A. Modeling inoculum dose dependent patterns of acute virus infections. *J Theor Biol*. 2014; 347:63–73. <https://doi.org/10.1016/j.jtbi.2014.01.008> PMID: [24440713](https://pubmed.ncbi.nlm.nih.gov/24440713/)
76. Zheng LL, Yang XX, Liu Y, Wan XY, Wu WB, Wang TT, et al. In situ labelling chemistry of respiratory syncytial viruses by employing the biotinylated host-cell membrane protein for tracking the early stage of virus entry. *Chem Comm*. 2014; 50:15776–15779. <https://doi.org/10.1039/C4CC06264G> PMID: [25370508](https://pubmed.ncbi.nlm.nih.gov/25370508/)
77. Liu SL, Zhang ZL, Tian ZQ, Zhao HS, Liu H, Sun EZ, et al. Effectively and Efficiently Dissecting the Infection of Influenza Virus by Quantum-Dot-Based Single-Particle Tracking. *ACS Nano*. 2012; 6(1):141–150. <https://doi.org/10.1021/nn2031353> PMID: [22117089](https://pubmed.ncbi.nlm.nih.gov/22117089/)
78. Avilov S, Magnus J, Cusack S, Naffakh N. Time-Resolved Visualisation of Nearly-Native Influenza A Virus Progeny Ribonucleoproteins and Their Individual Components in Live Infected Cells. *PLoS ONE*. 2016; 11(3):0149986. <https://doi.org/10.1371/journal.pone.0149986>
79. Yang X, Steukers L, Forier K, Xiong R, Braeckmans K, Reeth KV, et al. A Beneficiary Role for Neuraminidase in Influenza Virus Penetration through the Respiratory Mucus. *PLoS ONE*. 2014; 9(10):e110026. <https://doi.org/10.1371/journal.pone.0110026> PMID: [25333824](https://pubmed.ncbi.nlm.nih.gov/25333824/)
80. Bachi, Howe C. Morphogenesis and ultrastructure of respiratory syncytial virus. *J Virol*. 1973; 12(5):1173–1180. PMID: [4128827](https://pubmed.ncbi.nlm.nih.gov/4128827/)
81. Lamb R, Choppin P. The gene structure and replication of influenza virus. *Ann Rev Biochem*. 1983; 96:467–506. <https://doi.org/10.1146/annurev.bi.52.070183.002343>
82. Cush R, Russo PS, Kucukyavuz Z, Bu ZM, Neau D, Shih D, et al. Rotational and translational diffusion of a rodlike virus in random coil polymer solutions. *Macromolecules*. 1997; 30(17):4920–4926. <https://doi.org/10.1021/ma970032f>
83. Dadonaite B, Vijayakrishnan S, Fodor E, Bhella D, Hutchinson EC. Filamentous influenza viruses. *J Gen Virol*. 2016; 97:1755–1764. <https://doi.org/10.1099/jgv.0.000535> PMID: [27365089](https://pubmed.ncbi.nlm.nih.gov/27365089/)
84. Parupudi A, Gruia F, Korman SA, Dragulin-Otto S, Sra K, R RL Jr, et al. Biophysical characterization of influenza A virions. *J Virol Meth*. 2017; 247:91–98. <https://doi.org/10.1016/j.jviromet.2017.06.002>
85. Chariau PL, Lee KL, Pokorski JK, Saidel GM, Steinmetz NF. Diffusion and Uptake of Tobacco Mosaic Virus as Therapeutic Carrier in Tumor Tissue: Effect of Nanoparticle Aspect Ratio. *J Phys Chem*. 2016; 120(26):6120–6129. <https://doi.org/10.1021/acs.jpcc.6b02163>
86. Matrosovich MN, Matrosovich TY, Gray T, Roberts NA, Klenk HD. Neuraminidase Is Important for the Initiation of Influenza Virus Infection in Human Airway Epithelium. *J Virol*. 2004; 78(22):12665–12667. <https://doi.org/10.1128/JVI.78.22.12665-12667.2004> PMID: [15507653](https://pubmed.ncbi.nlm.nih.gov/15507653/)
87. Cohen M, Zhang XQ, Senaati HP, Chen HW, Varki NM, Schooley RT, et al. Influenza A penetrates host mucus by cleaving sialic acids with neuraminidase. *Virology*. 2013; 10:321. <https://doi.org/10.1186/1743-422X-10-321> PMID: [24261589](https://pubmed.ncbi.nlm.nih.gov/24261589/)
88. Seladi-Schulman J, Campbell PJ, Suppiah S, Steel J, Lowen AC. Filament-Producing Mutants of Influenza A/Puerto Rico/8/1934 (H1N1) Virus Have Higher Neuraminidase Activities than the Spherical Wild-Type. *PLoS ONE*. 2014; 9(11):e112462. <https://doi.org/10.1371/journal.pone.0112462> PMID: [25383873](https://pubmed.ncbi.nlm.nih.gov/25383873/)
89. Floyd DL, Ragains JR, Skehel JJ, Harrison SC, van Oijen AM. Single-particle kinetics of influenza virus membrane fusion. *Proc Natl Acad Sci USA*. 2008; 105(40):15382–15387. <https://doi.org/10.1073/pnas.0807771105> PMID: [18829437](https://pubmed.ncbi.nlm.nih.gov/18829437/)
90. Costello DA, Lee DW, Drewes J, Vasquez KA, Kisler K, Wiesner U, et al. Influenza Virus-Membrane Fusion Triggered by Proton Uncaging for Single Particle Studies of Fusion Kinetics. *Anal Chem*. 2012; 84(20):8480–8489. <https://doi.org/10.1021/ac3006473> PMID: [22974237](https://pubmed.ncbi.nlm.nih.gov/22974237/)

91. Imai M, Mizuno T, Kawasaki K. Membrane fusion by single influenza hemagglutinin trimers—Kinetic evidence from image analysis of hemagglutinin-reconstituted vesicles. *J Biol Chem*. 2006; 281(18):12729–12735. <https://doi.org/10.1074/jbc.M600902200> PMID: 16505474
92. Hotard AL, Lee S, Currier MG, James E Crowe J, Sakamoto K, Newcomb DC, et al. Identification of Residues in the Human Respiratory Syncytial Virus Fusion Protein That Modulate Fusion Activity and Pathogenesis. *J Virol*. 2015; 89(1):512–522. <https://doi.org/10.1128/JVI.02472-14> PMID: 25339762
93. Tian J, Huang K, Krishnan S, Svabek C, Rowe DC, Brewah Y, et al. RAGE inhibits human respiratory syncytial virus syncytium formation by interfering with F-protein function. *J Gen Virol*. 2013; 94(8):1691–1700. <https://doi.org/10.1099/vir.0.049254-0> PMID: 23559480
94. Lawlor HA, Schickli JH, Tang RS. A single amino acid in the F<sub>2</sub> subunit of respiratory syncytial virus fusion protein alters growth and fusogenicity. *J Gen Virol*. 2013; 94(12):2627–2635. <https://doi.org/10.1099/vir.0.055368-0> PMID: 24092758
95. Huong TN, Ravi LI, Tan BH, Sugrue RJ. Evidence for a biphasic mode of respiratory syncytial virus transmission in permissive HEP-2 cell monolayers. *Viol J*. 2016; 13:12. <https://doi.org/10.1186/s12985-016-0467-9> PMID: 26790623
96. Lay MK, Gonzalez PA, Leo MA, Cespedes PF, Bueno SM, Riedel CA, et al. Advances in understanding respiratory syncytial virus infection in airway epithelial cells and consequential effects on the immune response. *Microb Infect*. 2013; 15(3):230–242. <https://doi.org/10.1016/j.micinf.2012.11.012>
97. Collins PL, Graham BS. Viral and Host Factors in Human Respiratory Syncytial Virus Pathogenesis. *J Virol*. 2008; 82(5):2040–2055. <https://doi.org/10.1128/JVI.01625-07> PMID: 17928346
98. Zhang L, Peebles ME, Boucher RC, Collins PL, Pickles RJ. Respiratory Syncytial Virus Infection of Human Airway Epithelial Cells Is Polarized, Specific to Ciliated Cells, and without Obvious Cytopathology. *J Virol*. 2002; 76(11):5654–5666. <https://doi.org/10.1128/JVI.76.11.5654-5666.2002> PMID: 11991994
99. Matrosovich MN, Matrosovich TY, Gray T, Roberts NA, Klenk HD. Human and avian influenza viruses target different cell types in cultures of human airway epithelium. *P Natl Acad Sci USA*. 2004; 101(13):4620–4624. <https://doi.org/10.1073/pnas.0308001101>
100. Martinez I, Melero JA. Binding of human respiratory syncytial virus to cells: implication of sulfated cell surface proteoglycans. *J Gen Virol*. 2000; 81:2715–2722. <https://doi.org/10.1099/0022-1317-81-11-2715> PMID: 11038384
101. Crystal RG, West JB. *The Lung*: Scientific Foundations. New York, USA: Raven Press Ltd.; 1991.
102. Mercer R, Russell M, Roggli V, Crapo J. Cell number and distribution in human and rat airways. *Am J Resp Cell Mol Biol*. 1994; 10(6):613–624. <https://doi.org/10.1165/ajrcmb.10.6.8003339>
103. Madrahimov A, Helikar T, Kowal B, Lu G, Rogers J. Dynamics of Influenza Virus and Human Host Interactions During Infection and Replication Cycle. *Bull Math Biol*. 2013; 75(6):988–1011. <https://doi.org/10.1007/s11538-012-9777-2> PMID: 23081726
104. Murillo LN, Murillo MS, Perelson AS. Towards multiscale modeling of influenza infection. *J Theor Biol*. 2013; 332:267–290. <https://doi.org/10.1016/j.jtbi.2013.03.024> PMID: 23608630
105. Zhang L, Collins PL, Lamb RA, Pickles RJ. Comparison of differing cytopathic effects in human airway epithelium of parainfluenza virus 5 (W3A), parainfluenza virus type 3, and respiratory syncytial virus. *Viol*. 2011; 421(1):67–77. <https://doi.org/10.1016/j.virol.2011.08.020>
106. Pickles RJ, DeVincenzo JP. Respiratory syncytial virus (RSV) and its propensity for causing bronchiolitis. *J Pathol*. 2015; 235:266–276. <https://doi.org/10.1002/path.4462> PMID: 25302625
107. Bukrinskaya AG. Cytopathic effect of type A2 influenza virus in tissue cultures of different susceptibility. *Acta Virologica*. 1960; 4:146–9. PMID: 13849230
108. Scholtissek C, Becht H, Drzeniek R. Biochemical studies on the cytopathic effect of influenza viruses. *J Gen Virol*. 1967; 1(2):219–25. <https://doi.org/10.1099/0022-1317-1-2-219> PMID: 6060244
109. Chonmaitree T, Roberts N, Douglas R, Hall C, Simons R. Interferon production by human mononuclear leukocytes—differences between respiratory syncytial virus and influenza viruses. *Infect Immun*. 1981; 32(1):300–303. PMID: 6163726
110. Roberts N. Different effects of influenza virus, respiratory syncytial virus, and Sendai virus on human lymphocytes and macrophages. *Infect Immun*. 1982; 35(3):1142–1146. PMID: 6175576
111. Roberts N, Prill A, Mann T. Interleukin-1 and interleukin-2 inhibitor production by human macrophages exposed to influenza virus or respiratory syncytial virus—respiratory syncytial virus is a potent inducer of inhibitor activity. *J Exp Med*. 1986; 163(3):511–519. <https://doi.org/10.1084/jem.163.3.511> PMID: 3485170
112. Salkin A, Nichols J, Roberts N. Suppressed expression of ICAM-1 and LFA-1 and abrogation of leukocyte collaboration after exposure of human mononuclear leukocytes to respiratory syncytial virus in

- vitro—comparison with exposure to influenza virus. *J Clin Invest*. 1991; 88(2):505–511. <https://doi.org/10.1172/JCI115332>
113. Byeon JH, Lee JC, Choi IS, Yoo Y, Park SH, Choung JT. Comparison of cytokine responses in nasopharyngeal aspirates from children with viral lower respiratory tract infections. *Acta Paediatrica*. 2009; 98(4):725–730. <https://doi.org/10.1111/j.1651-2227.2008.01208.x> PMID: 19183120
  114. Fleming EH, Ochoa EE, Nichols JE, O'Banion MK, Salkind AR, R NJ Jr. Reduced activation and proliferation of human lymphocytes exposed to respiratory syncytial virus compared to cells exposed to influenza virus. *J Med Virol*. 2018; 90(1):26–33. <https://doi.org/10.1002/jmv.24917> PMID: 28856681
  115. Shinjoh M, Omoe K, Saito N, Matsuo N, Nerome K. In vitro growth profiles of respiratory syncytial virus in the presence of influenza virus. *Acta Virologica*. 2000; 44(2):91–97. PMID: 10989700
  116. Shih S, Tsao K, Ning H, Huang Y, Lin T. Diagnosis of respiratory tract viruses in 24 h by immunofluorescent staining of shell vial cultures containing Madin-Darby Canine Kidney (MDCK) cells. *J Virol Meth*. 1999; 81(1–2):77–81. [https://doi.org/10.1016/S0166-0934\(99\)00065-8](https://doi.org/10.1016/S0166-0934(99)00065-8)
  117. Vlecken DHW, Pelgrim RPM, Ruminski S, Bakker WAM, van der Pol LA. Comparison of initial feasibility of host cell lines for viral vaccine production. *J Virol Meth*. 2013; 193(1):28–41. <https://doi.org/10.1016/j.jviromet.2013.04.020>
  118. Shirato K, Ujiike M, Kawase M, Matsuyama S. Identification of CCL2, RARRES2 and EFNB2 as host cell factors that influence the multistep replication of respiratory syncytial virus. *Virus Res*. 2015; 210:213–226. <https://doi.org/10.1016/j.virusres.2015.08.006> PMID: 26277777
  119. Lukacs NW, Moore ML, Rudd BD, Berlin AA, Collins RD, Olson SJ, et al. Differential immune responses and pulmonary pathophysiology are induced by two different strains of respiratory syncytial virus. *Am J Pathol*. 2006; 169(3):977–986. PMID: 16936271
  120. Stokes KL, Chi MH, Sakamoto K, Newcomb DC, Currier MG, Huckabee MM, et al. Differential Pathogenesis of Respiratory Syncytial Virus Clinical Isolates in BALB/c Mice. *J Virol*. 2011; 85(12):5782–5793. <https://doi.org/10.1128/JVI.01693-10> PMID: 21471228
  121. Battles MB, Langedijk JP, Furmanova-Hollenstein P, Chaiwatpongsakorn S, Costello HM, Kwanten L, et al. Molecular mechanism of respiratory syncytial virus fusion inhibitors. *Nat Chem Biol*. 2016; 12(2):87. <https://doi.org/10.1038/nchembio.1982> PMID: 26641933
  122. Yan D, Lee S, Thakkar VD, Luo M, Moore ML, Plemper RK. Cross-resistance mechanism of respiratory syncytial virus against structurally diverse entry inhibitors. *Proc Natl Acad Sci USA*. 2014; 111(33):E3441–E3449. <https://doi.org/10.1073/pnas.1405198111> PMID: 25092342
  123. Holder BP, Simon P, Liao LE, Abed Y, Bouhy X, Beauchemin CAA, et al. Assessing the In Vitro Fitness of an Oseltamivir-Resistant Seasonal A/H1N1 Influenza Strain Using a Mathematical Model. *PLOS One*. 2011; 6(3):e14767. <https://doi.org/10.1371/journal.pone.0014767> PMID: 21455300
  124. Pinky L, Dobrovolsky HM. Coinfections of the Respiratory Tract: Viral Competition for Resources. *PLoS ONE*. 2016; 11(5):e0155589. <https://doi.org/10.1371/journal.pone.0155589> PMID: 27196110
  125. Möhler L, Flockerzi D, Sann H, Reichl U. Mathematical model of influenza A virus production in large-scale microcarrier culture. *Biotechnol Bioeng*. 2005; 90(1):46–58. <https://doi.org/10.1002/bit.20363> PMID: 15736163
  126. Gaush CR, Smith TF. Replication and Plaque Assay of Influenza Virus in an Established Line of Canine Kidney Cells. *App Microbiol*. 1968; 16(4):588–594.
  127. Smith AM, Adler FR, Perelson AS. An accurate two-phase approximate solution to an acute viral infection model. *J Math Biol*. 2010; 60(5):711–726. <https://doi.org/10.1007/s00285-009-0281-8> PMID: 19633852
  128. Petrie SM, Guarnaccia T, Laurie KL, Hurt AC, McVernon J, McCaw JM. Reducing Uncertainty in Within-Host Parameter Estimates of Influenza Infection by Measuring Both Infectious and Total Viral Load. *PLoS One*. 2013; 8(5):e64098. <https://doi.org/10.1371/journal.pone.0064098> PMID: 23691157
  129. LaBarre DD, Lowy RJ. Improvements in methods for calculating virus titer estimates from  $TCID_{50}$  and plaque assays. *J Virol Meth*. 2001; 96(2):107–126. [https://doi.org/10.1016/S0166-0934\(01\)00316-0](https://doi.org/10.1016/S0166-0934(01)00316-0)
  130. Darling A, Boose J, Spaltro J. Virus assay methods: Accuracy and validation. *Biologicals*. 1998; 26(2):105–110. <https://doi.org/10.1006/biol.1998.0134> PMID: 9811514
